# Supplementary material for: Key dimensions of post-traumatic stress disorder and endothelial dysfunction: a protocol for a mechanism-focused cohort study
Source: PubMed Central journal article supplement — BMJ Open. 2021 May 5;11(5):e043060. doi: 10.1136/bmjopen-2020-043060 (PMC8103395; doi:10.1136/bmjopen-2020-043060), 2021-05-05
Supplement: bmjopen-2020-043060.draft_revisions.pdf [file bmjopen-2020-043060.draft_revisions.pdf]

# BMJ Open

BMJ Open is committed to open peer review. As part of this commitment we make the peer review history of every article we publish publicly available.

When an article is published we post the peer reviewers' comments and the authors' responses online. We also post the versions of the paper that were used during peer review. These are the versions that the peer review comments apply to.

The versions of the paper that follow are the versions that were submitted during the peer review process. They are not the versions of record or the final published versions. They should not be cited or distributed as the published version of this manuscript.

BMJ Open is an open access journal and the full, final, typeset and author-corrected version of record of the manuscript is available on our site with no access controls, subscription charges or pay-per-view fees (<http://bmjopen.bmj.com>).

If you have any questions on BMJ Open's open peer review process please email [info.bmjopen@bmj.com](mailto:info.bmjopen@bmj.com)

# BMJ Open

## Key dimensions of posttraumatic stress disorder and endothelial dysfunction: a mechanism-focused cohort study

|                               |                                                                                                                                                                                                                                                                                                                                                                                                                                                                                                                                                                                                                                                                                                                                                                                                                                                                                                                                                                                                                                                                                                                                                                                 |
|-------------------------------|---------------------------------------------------------------------------------------------------------------------------------------------------------------------------------------------------------------------------------------------------------------------------------------------------------------------------------------------------------------------------------------------------------------------------------------------------------------------------------------------------------------------------------------------------------------------------------------------------------------------------------------------------------------------------------------------------------------------------------------------------------------------------------------------------------------------------------------------------------------------------------------------------------------------------------------------------------------------------------------------------------------------------------------------------------------------------------------------------------------------------------------------------------------------------------|
| Journal:                      | <i>BMJ Open</i>                                                                                                                                                                                                                                                                                                                                                                                                                                                                                                                                                                                                                                                                                                                                                                                                                                                                                                                                                                                                                                                                                                                                                                 |
| Manuscript ID                 | bmjopen-2020-043060                                                                                                                                                                                                                                                                                                                                                                                                                                                                                                                                                                                                                                                                                                                                                                                                                                                                                                                                                                                                                                                                                                                                                             |
| Article Type:                 | Protocol                                                                                                                                                                                                                                                                                                                                                                                                                                                                                                                                                                                                                                                                                                                                                                                                                                                                                                                                                                                                                                                                                                                                                                        |
| Date Submitted by the Author: | 23-Jul-2020                                                                                                                                                                                                                                                                                                                                                                                                                                                                                                                                                                                                                                                                                                                                                                                                                                                                                                                                                                                                                                                                                                                                                                     |
| Complete List of Authors:     | Cleveland, Shiloh; University of California Los Angeles, Psychology<br>Reed, Kristina; University of California Los Angeles, Psychology<br>Thomas, Jordan; University of California Los Angeles, Psychology<br>Ajjola, Olujimi; University of California Los Angeles, Neurocardiology<br>Research Center of Excellence, Cardiac Arrhythmia Center<br>Ebrahimi, Ramin; University of California Los Angeles, Medicine;<br>Veterans Affairs Greater Los Angeles Healthcare System, Medicine,<br>Cardiology Section<br>Hsiai, Tzung; University of California Los Angeles, Medicine; University of<br>California Los Angeles, Bioengineering<br>Lazarov, Amit; Tel Aviv University, School of Psychological Sciences<br>Montoya, Amanda; University of California Los Angeles, Psychology<br>Neria, Yuval; Columbia University Irving Medical Center, Psychiatry;<br>Columbia University Irving Medical Center, Epidemiology<br>Shimbo, Daichi; Columbia University Irving Medical Center, Medicine<br>Wolitzky-Taylor, Kate; University of California Los Angeles, Psychiatry<br>and Biobehavioral Sciences<br>Sumner, Jennifer; University of California Los Angeles, Psychology |
| Keywords:                     | Anxiety disorders < PSYCHIATRY, Adult psychiatry < PSYCHIATRY,<br>Cardiology < INTERNAL MEDICINE                                                                                                                                                                                                                                                                                                                                                                                                                                                                                                                                                                                                                                                                                                                                                                                                                                                                                                                                                                                                                                                                                |
|                               |                                                                                                                                                                                                                                                                                                                                                                                                                                                                                                                                                                                                                                                                                                                                                                                                                                                                                                                                                                                                                                                                                                                                                                                 |

SCHOLARONE™  
Manuscripts

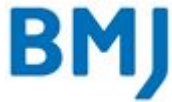

I, the Submitting Author has the right to grant and does grant on behalf of all authors of the Work (as defined in the below author licence), an exclusive licence and/or a non-exclusive licence for contributions from authors who are: i) UK Crown employees; ii) where BMJ has agreed a CC-BY licence shall apply, and/or iii) in accordance with the terms applicable for US Federal Government officers or employees acting as part of their official duties; on a worldwide, perpetual, irrevocable, royalty-free basis to BMJ Publishing Group Ltd ("BMJ") its licensees and where the relevant Journal is co-owned by BMJ to the co-owners of the Journal, to publish the Work in this journal and any other BMJ products and to exploit all rights, as set out in our [licence](#).

The Submitting Author accepts and understands that any supply made under these terms is made by BMJ to the Submitting Author unless you are acting as an employee on behalf of your employer or a postgraduate student of an affiliated institution which is paying any applicable article publishing charge ("APC") for Open Access articles. Where the Submitting Author wishes to make the Work available on an Open Access basis (and intends to pay the relevant APC), the terms of reuse of such Open Access shall be governed by a Creative Commons licence – details of these licences and which [Creative Commons](#) licence will apply to this Work are set out in our licence referred to above.

Other than as permitted in any relevant BMJ Author's Self Archiving Policies, I confirm this Work has not been accepted for publication elsewhere, is not being considered for publication elsewhere and does not duplicate material already published. I confirm all authors consent to publication of this Work and authorise the granting of this licence.

1  
2  
3  
4  
5  
6  
7 Key Dimensions of Posttraumatic Stress Disorder and Endothelial Dysfunction:

8  
9 A Mechanism-Focused Cohort Study

10  
11  
12  
13 Shiloh Cleveland,<sup>1</sup> Kristina Reed,<sup>1</sup> Jordan L. Thomas,<sup>1</sup> Olujimi A. Ajijola,<sup>2</sup> Ramin Ebrahimi,<sup>3,4</sup>

14  
15 Tzung Hsiai,<sup>4,5</sup> Amit Lazarov,<sup>6</sup> Amanda K. Montoya,<sup>1</sup> Yuval Neria,<sup>7,8</sup> Daichi Shimbo,<sup>9</sup> Kate

16  
17 Wolitzky-Taylor,<sup>10</sup> Jennifer A. Sumner<sup>1\*</sup>

18  
19  
20  
21 <sup>1</sup>Department of Psychology, University of California, Los Angeles, Los Angeles, CA, USA

22  
23 <sup>2</sup>Neurocardiology Research Center of Excellence, Cardiac Arrhythmia Center, University of  
24 California, Los Angeles, Los Angeles, CA, USA

25  
26 <sup>3</sup>Department of Medicine, Cardiology Section, Veterans Affairs Greater Los Angeles Healthcare  
27 System, Los Angeles, CA, USA

28  
29 <sup>4</sup>Department of Medicine, University of California, Los Angeles, Los Angeles, CA, USA

30  
31 <sup>5</sup>Department of Bioengineering, University of California, Los Angeles, Los Angeles, CA, USA

32  
33 <sup>6</sup>School of Psychological Sciences, Tel Aviv University, Tel Aviv, Israel

34  
35 <sup>7</sup>Department of Psychiatry, Columbia University Irving Medical Center, New York, NY, USA

36  
37 <sup>8</sup>Department of Epidemiology, Columbia University Irving Medical Center, New York, NY,  
38 USA

39  
40 <sup>9</sup>Department of Medicine, Columbia University Irving Medical Center, New York, NY, USA

41  
42 <sup>10</sup>Department of Psychiatry and Biobehavioral Sciences, University of California, Los Angeles,  
43 Los Angeles, CA, USA

44  
45 \*Corresponding author: Jennifer A. Sumner, PhD, Department of Psychology, University of  
46 California, Los Angeles, Psychology Building 1285, Box 951563, Los Angeles, CA 90095-1563;  
47 E-mail: [jsumner@psych.ucla.edu](mailto:jsumner@psych.ucla.edu)

48  
49  
50  
51 Word count: 4,000

## ABSTRACT

### Introduction

Both trauma exposure and posttraumatic stress disorder (PTSD) are associated with increased risk of cardiovascular disease (CVD), the leading cause of death in the United States. Endothelial dysfunction, a modifiable, early marker of CVD risk, may represent a physiological mechanism underlying this association and a promising target for intervention given its malleability. This mechanism-focused cohort study aims to investigate the relationship between PTSD (both in terms of diagnosis and underlying symptom dimensions) and endothelial dysfunction in a diverse, community-based sample of adult men and women.

### Methods and analysis

Using a cohort design, 160 trauma-exposed participants without a history of CVD are designated to the PTSD group ( $n=80$ ) or trauma-exposed matched control group ( $n=80$ ) after a baseline diagnostic interview assessment. Participants in the PTSD group have a current (past-month) diagnosis of PTSD, whereas those in the control group have a history of trauma but no current or past psychiatric diagnoses. Endothelial dysfunction is assessed via flow-mediated vasodilation (FMD) of the brachial artery and circulating levels of endothelial cell-derived microparticles (EMPs). Two higher-order symptom dimensions of PTSD—fear and dysphoria—are measured objectively with a fear conditioning paradigm and attention allocation task, respectively. Autonomic imbalance, inflammation, and oxidative stress are additionally assessed and will be examined as potential pathway variables linking PTSD and its dimensions with endothelial dysfunction. Participants are invited to return for a 2-year follow-up visit to re-assess PTSD and its dimensions and endothelial dysfunction in order to investigate longitudinal associations.

### Ethics and Dissemination plan

1  
2  
3 This study is conducted in compliance with the Helsinki Declaration and University of  
4  
5 California, Los Angeles Institutional Review Board. The results of this study will be  
6  
7 disseminated via articles in peer-reviewed journals and presentations at academic conferences  
8  
9  
10 and to community partners.

11  
12 **Trial registration number**

13  
14  
15 NCT03778307; Pre-results  
16  
17  
18  
19  
20

21 **Keywords:** Trauma; posttraumatic stress disorder; mental health; endothelial dysfunction;  
22  
23  
24 cardiology  
25  
26  
27  
28  
29  
30  
31  
32  
33  
34  
35  
36  
37  
38  
39  
40  
41  
42  
43  
44  
45  
46  
47  
48  
49  
50  
51  
52  
53  
54  
55  
56  
57  
58  
59  
60

## ARTICLE SUMMARY

### Strengths and limitations of this study

- This is the first study to assess endothelial dysfunction, an early marker of CVD risk, using both functional (FMD) and cellular (EMP) approaches in a sample of trauma-exposed individuals.
- This study is the first to investigate whether PTSD and its dimensions are related to change in endothelial dysfunction over time.
- This study comprehensively examines whether objective measures of underlying dimensions of PTSD—fear and dysphoria—are related to endothelial dysfunction.
- Whereas previous research on PTSD and endothelial dysfunction has been conducted in predominantly male samples of veterans and police officers, we have a diverse, community-based sample of men and women with and without current PTSD who have been exposed to a range of traumas.
- Although the approach of assessing key constructs in the research laboratory permits more controlled measures of these constructs, it limits the generalizability of findings to participants' experiences in real-world settings.

## INTRODUCTION

Despite advances in prevention and intervention, cardiovascular disease (CVD) remains the leading cause of death in the United States.<sup>1</sup> Growing research demonstrates longitudinal links between trauma exposure, posttraumatic stress disorder (PTSD), and CVD, suggesting trauma and PTSD as novel targets for reducing CVD risk. Trauma is common and wide-ranging in nature. The vast majority of individuals (50-90%) experience a trauma in their lifetime, including natural disaster exposure, physical assault, and unwanted sexual contact.<sup>2,3</sup> PTSD is the quintessential trauma-related disorder, characterized by symptoms of re-experiencing of the trauma, avoidance of trauma reminders, negative alterations in cognition and mood, and hyperarousal.<sup>4</sup> PTSD has been associated with heightened risk of incident CVD, even after accounting for numerous risk factors.<sup>5-11</sup> Trauma exposure, independent of trauma-related psychopathology, has also been linked to elevated CVD risk.<sup>5 12-14</sup>

Given this evidence, experts in clinical psychology and cardiology have called for CVD risk surveillance after trauma.<sup>15</sup> To support such efforts, it is critical to identify intermediary mechanisms linking posttraumatic stress and CVD risk that can guide monitoring and intervention approaches. Endothelial dysfunction may be one such intermediary mechanism. Endothelial cells, which form the inner lining of blood vessels, are one of the first physiological indicators of reduced capacity to respond to cardiovascular demand, and endothelial dysfunction is implicated in the pathophysiology of atherosclerosis and CVD.<sup>16 17</sup> For every 1% decrease in brachial artery flow-mediated vasodilation (FMD; a functional measure of endothelial dysfunction), risk of CVD events increases by 9-13%.<sup>18-20</sup> Endothelial dysfunction can also be assessed by quantifying circulating levels of endothelial cell-derived microparticles (EMPs), direct measures of endothelial cell injury involved in atherosclerosis risk.<sup>21-24</sup> Endothelial



1  
2  
3 dysfunction can be detected in CVD-free individuals,<sup>25</sup> and it is a malleable risk marker  
4  
5 responsive to intervention,<sup>26 27</sup> making it an optimal target for prevention and risk mechanism  
6  
7 research.  
8  
9

10 Initial studies in select samples (e.g., women aged 40-60 years, male veterans or police  
11  
12 officers) suggest that trauma exposure and elevated PTSD symptoms are associated with lower  
13  
14 FMD.<sup>28-30</sup> PTSD has also been associated with biomarkers of endothelial dysfunction,<sup>31 32</sup>  
15  
16 although no studies have considered specific markers of cellular injury (EMPs). Additionally,  
17  
18 work in trauma-exposed individuals reveals that the greater the PTSD symptom severity, the  
19  
20 lower the FMD, even among individuals without PTSD diagnoses.<sup>28</sup> Existing research has been  
21  
22 limited by treating PTSD as a homogeneous diagnosis. PTSD has great heterogeneity in how  
23  
24 symptoms manifest,<sup>33</sup> and understanding which aspects of PTSD particularly affect intermediary  
25  
26 mechanisms will inform monitoring efforts and intervention development. Broadly, PTSD  
27  
28 consists of two higher-order dimensions: fear and dysphoria.<sup>34-36</sup> Fear reflects an alarm response  
29  
30 to perceived danger, whereas dysphoria represents low positive affect and anhedonia.<sup>34</sup>  
31  
32  
33  
34  
35

36 PTSD dimensions hold promise for distinguishing specific versus nonspecific aspects of  
37  
38 the disorder.<sup>34</sup> Whereas dysphoria is considered an auxiliary component of PTSD that is shared  
39  
40 with depression, fear is considered a core component of PTSD.<sup>37</sup> Longitudinal network analyses  
41  
42 indicate that fear responses are central aspects of acute and chronic posttraumatic stress  
43  
44 responses, whereas dysphoria symptoms are secondary responses that develop over time.<sup>35</sup>  
45  
46 Furthermore, impaired fear learning and inability to suppress fear in safe situations are key  
47  
48 pathological processes in PTSD.<sup>38</sup> Fear conditioning paradigms provide a translational  
49  
50 framework for examining dysregulated fear responses.<sup>39</sup> These responses can be measured using  
51  
52 objective psychophysiological measures, including skin conductance (SC) responses and fear-  
53  
54  
55  
56  
57  
58  
59  
60

1  
2  
3 potentiated startle (FPS).<sup>40-42</sup> PTSD is characterized by psychophysiological responses indicative  
4 of dysregulated fear responding, including difficulties with safety signal processing and fear  
5 inhibition.<sup>43-45</sup> Additionally, some trauma-exposed individuals without PTSD exhibit  
6 psychophysiological responses akin to individuals with PTSD.<sup>46-47</sup> Thus, even trauma-exposed  
7 individuals without a PTSD diagnosis may experience trauma-related psychophysiological fear  
8 that could explain their lower FMD.<sup>28</sup>

9  
10  
11  
12  
13  
14  
15  
16  
17 Psychophysiological fear responses are promising targets for understanding links  
18 between PTSD and CVD risk, as they may engage key biological mechanisms. For example,  
19 repeated bouts of psychophysiological reactivity may promote autonomic dysregulation<sup>48-50</sup> and  
20 elevated systemic inflammation and oxidative stress,<sup>51-53</sup> which can have deleterious effects on  
21 cardiovascular health.<sup>54</sup> Research has yet to comprehensively examine mechanisms by which  
22 psychophysiological fear—or another PTSD dimension—may relate to endothelial dysfunction.

### 30 31 **Objectives**

32  
33 This study examines links between PTSD and its dimensions with endothelial  
34 dysfunction in trauma-exposed men and women (see Figure 1 for conceptual model). First, we  
35 examine the association of PTSD diagnosis with endothelial dysfunction, assessed via functional  
36 (FMD) and cellular (EMP) measures. We hypothesize that participants with versus without  
37 PTSD will have lower FMD and, secondarily, greater EMP levels. Second, we investigate which  
38 PTSD dimensions are most strongly associated with endothelial dysfunction. We predict that  
39 stronger psychophysiological fear responses (measured by FPS and SC) will be associated with  
40 lower FMD and, secondarily, greater EMP levels. Although we focus on the core dimension of  
41 fear, we investigate the dysphoria-endothelial dysfunction relation to comprehensively assess  
42 potential intervention targets. Third, we explore autonomic imbalance, inflammation, and  
43  
44  
45  
46  
47  
48  
49  
50  
51  
52  
53  
54  
55  
56  
57  
58  
59  
60

oxidative stress as potential mechanisms. Finally, we examine whether PTSD and its dimensions predict change in endothelial dysfunction over 2 years.

## METHODS AND ANALYSIS

### Brief Study Overview

This mechanism-focused cohort study examines primarily cross-sectional and, secondarily longitudinal, associations. Investigating the PTSD diagnosis-endothelial dysfunction relation utilizes a case-control approach, whereas analyses of PTSD dimensions are conducted in the full sample. The sample will include 160 men and women without CVD from the Los Angeles area (80 individuals with PTSD and 80 trauma-exposed controls). Group designations are determined via diagnostic interview assessment.

### Participants

Eligible participants are  $\geq 18$  years old, fluent English speakers, and trauma-exposed. Participants in the PTSD group have a current PTSD diagnosis based on the past-month Clinician-Administered PTSD Scale for *DSM-5* (CAPS-5),<sup>55</sup> whereas controls have trauma exposure but no psychiatric diagnoses and a CAPS-5 total score  $< 25$ .<sup>56</sup> Exclusions include (a) CVD history (physician-diagnosed myocardial infarction, angina, heart failure, peripheral artery disease, stroke, transient ischemic attack, atrial fibrillation, ventricular arrhythmias); (b) current psychotropic medication use (except benzodiazepines taken as-needed); (c) current bipolar, psychotic, or moderate or severe substance use disorder; (d) mild or severe cognitive impairment (Mini-Mental State Exam (MMSE) score  $\geq 18$ );<sup>57</sup> (e) acute, unstable, or severe medical disorder or pregnancy; or (f) needing immediate psychiatric intervention (e.g., active suicidality).

### Recruitment and Enrollment

1  
2  
3 The study timeline, with measures administered at each assessment, is depicted in Figure  
4  
5  
6 2. Participants are recruited via online advertisements, University of California, Los Angeles  
7  
8 (UCLA) staff listservs, flyers throughout the community, and word-of-mouth referrals. Interested  
9  
10 individuals are phone-screened to assess initial eligibility. After obtaining verbal consent,  
11  
12 research personnel assess inclusion and exclusion criteria: English fluency, CVD history,  
13  
14 psychotropic medication use, lifetime exposure to 17 types of traumas (using the Life Events  
15  
16 Checklist for *DSM-5* (LEC-5)),<sup>58</sup> and past-month PTSD symptoms with respect to the trauma  
17  
18 participants identify as most distressing (using the PTSD Checklist for *DSM-5* (PCL-5)).<sup>59</sup> The  
19  
20 most distressing trauma is categorized as combat, non-combat interpersonal violence (e.g.,  
21  
22 assault), or non-interpersonal violence (e.g., accident),<sup>60</sup> and time since trauma is recorded.  
23  
24 Eligible individuals are scheduled for a diagnostic interview assessment.  
25  
26  
27

## 28 **Procedures**

### 29 ***Diagnostic Interview Assessment***

30  
31  
32 Highly trained research personnel administer standardized clinical interviews.  
33  
34 Interviewers have at least a Bachelor's degree and complete extensive training that includes self-  
35  
36 study, didactics, tests to correctly diagnose cases from audio recordings, and role-playing. After  
37  
38 obtaining written informed consent, the interviewer conducts a brief clinical interview to build  
39  
40 rapport and review information about the participant's history and current functioning.  
41  
42  
43

44  
45 The first diagnostic interview administered is the CAPS-5,<sup>55</sup> the gold standard in PTSD  
46  
47 assessment.<sup>61</sup> It is a structured interview querying individuals' past-month experiences of the 20  
48  
49 *DSM-5* PTSD criteria.<sup>61</sup> Symptoms are anchored to an index trauma self-identified by  
50  
51 participants as their most distressing event. Responses for each symptom are scored with respect  
52  
53 to frequency and intensity and combined into a severity score ranging from 0 (Absent) to 4  
54  
55  
56  
57  
58  
59  
60

1  
2  
3 (Extreme/incapacitating). Symptom severity scores are used to determine a current PTSD  
4  
5 diagnosis (according to *DSM-5* criteria) and summed to create a total severity score. Presence  
6  
7 and history of other psychopathology are evaluated using the Structured Clinical Interview for  
8  
9 *DSM-5*, Research Version (SCID-5-RV),<sup>62</sup> the gold standard in psychopathology assessment.  
10  
11 Mood disorder episodes and psychotic symptoms are assessed for all participants, whereas  
12  
13 anxiety, substance abuse, eating, and obsessive-compulsive disorders are assessed as needed  
14  
15 based on screening questions. Interviewers then assess participants' medical history and health  
16  
17 behaviors, including family history of CVD, personal history of medical conditions, medication  
18  
19 use, smoking, and physical activity. If cognitive impairment is suspected, the MMSE is  
20  
21 administered.<sup>57</sup>  
22  
23  
24  
25

26 Participants conclude the visit by completing several valid and reliable questionnaires.  
27  
28 After reporting on sociodemographics, participants complete measures of childhood adversity:  
29  
30 the Childhood Trauma Questionnaire<sup>63</sup> (measuring child abuse and neglect); the Childhood  
31  
32 Experiences of Care and Abuse<sup>64</sup> antipathy and neglect items (anchored to participants' primary  
33  
34 caregiver); the Conflict Tactics Scale<sup>65</sup> (measuring family violence); and a food insecurity  
35  
36 measure based on the U.S. Department of Agriculture's Food Security Scale.<sup>66</sup> Participants  
37  
38 report on PTSD symptoms (anchored to the CAPS-5 index trauma) using the PCL-5<sup>59 67</sup> and  
39  
40 depressive symptoms using the Patient Health Questionnaire-8.<sup>68</sup> Participants describe their sleep  
41  
42 with the Pittsburgh Sleep Quality Index (PSQI)<sup>69</sup> and PSQI Addendum for PTSD<sup>70</sup> (measuring  
43  
44 past-month sleep patterns and frequency of disruptive nocturnal behaviors characteristic of  
45  
46 PTSD, respectively); Insomnia Severity Index<sup>71</sup> (measuring insomnia); and RU-SATED<sup>72</sup>  
47  
48 (measuring sleep health).  
49  
50  
51  
52  
53  
54  
55  
56  
57  
58  
59  
60

1  
2  
3 Propensity scores are used in recruitment to improve balance of sociodemographic and  
4 trauma-related characteristics across the PTSD and trauma-exposed control groups.<sup>73</sup> Scores are  
5 calculated using age, gender, race/ethnicity, trauma type, time since trauma, and two-way  
6 interactions among these variables. Matching during recruitment is based on quintiles of the  
7 propensity score distribution, with scores re-estimated weekly throughout recruitment.  
8  
9 Participants are recruited if there is no more than 1-3 unmatched individuals from their group in  
10 the same quintile.  
11  
12  
13  
14  
15  
16  
17  
18

19 Results of the diagnostic interview assessment are reviewed by interviewers and  
20 supervised by a licensed clinical psychologist. Participants are informed of their eligibility via  
21 phone and scheduled for a laboratory visit approximately 2-3 weeks post-interview if eligible.  
22  
23  
24  
25

### 26 ***Baseline Laboratory Visit***

27  
28 Participants are instructed to avoid exercise, food and drink (other than water), smoking,  
29 and use of other tobacco, marijuana, or cannabidiol-containing products at least eight hours  
30 before this visit. Participants refrain from taking medications and vitamins (except diabetes  
31 medication, blood thinners, statins, and birth control) for at least 48 hours.  
32  
33  
34  
35  
36  
37

38 Participants are asked to arrive at the UCLA research laboratory by 8am. They are  
39 escorted to a study room for initial measurements and specimen collection; assessments are  
40 conducted by a research nurse. Height, weight, waist and hip circumferences, and left arm  
41 circumference are measured, and a spot urine sample is collected. An appropriately sized blood  
42 pressure cuff is then placed on the left arm. After a 5-minute rest, three seated blood pressure  
43 measures are taken 1 minute apart using a validated device (Omron HEM907XL). Blood is then  
44 drawn into serum-separating, citrate, and EDTA tubes. The citrate tube is centrifuged  
45 immediately and processed to measure EMPs. The remaining tubes are processed for a  
46  
47  
48  
49  
50  
51  
52  
53  
54  
55  
56  
57  
58  
59  
60

1  
2  
3 comprehensive metabolic panel, lipid panel, and HbA1c; plasma aliquots are stored at -80°C for  
4  
5 inflammatory marker assays.  
6

7  
8 Participants are then escorted to a temperature-controlled room to measure brachial artery  
9  
10 FMD using a high-resolution, semi-automatic ultrasonography system (UNEXEF38G).<sup>74-76</sup>  
11  
12 Testing occurs between 8-10am to account for circadian effects on FMD and is conducted  
13  
14 according to published guidelines.<sup>77 78</sup> Participants lie supine, and a blood pressure cuff is placed  
15  
16 around the right forearm. After a 15-minute rest, a baseline measure of brachial artery diameter  
17  
18 is obtained. The UNEXEF38G system has a high-resolution linear artery transducer, coupled to  
19  
20 computer-assisted analysis software that uses an automated edge detection system for  
21  
22 measurement. The cuff is then inflated to 200mmHg (or 50mmHg above systolic pressure, if  
23  
24 higher than 150mmHg) for 5 minutes. The image of the brachial artery is measured continuously  
25  
26 until 2 minutes after cuff deflation.  
27  
28  
29

30  
31 After FMD measurement, participants are provided with a snack before completing  
32  
33 behavioral tasks assessing posttraumatic fear and dysphoria. Task order is counterbalanced. Prior  
34  
35 to completing the fear conditioning paradigm used to assess posttraumatic fear, participants  
36  
37 undergo a heart rate response to deep breathing (HRDB) protocol; both tasks involve  
38  
39 psychophysiological measurements. HRDB tests autonomic function, specifically  
40  
41 parasympathetic tone.<sup>79</sup> For this task, participants lie supine. Respiration is measured with a  
42  
43 respiration belt. ECG is measured with electrodes placed above the left and right collar bones  
44  
45 and on the left lower forearm and recorded with the Biopac MP160 ECG wireless module. ECG  
46  
47 and respiration data are collected during a 1-minute resting baseline and 10-second respiratory  
48  
49 cycle (5-second inhale, 5-second exhale), repeated six times.<sup>79</sup>  
50  
51  
52  
53  
54  
55  
56  
57  
58  
59  
60

1  
2  
3 Posttraumatic fear is assessed using an established fear conditioning protocol with two  
4 phases: Fear Acquisition and Extinction.<sup>43 80</sup> During Fear Acquisition, participants complete a 4-  
5 trial habituation phase in which two colored shape conditioned stimuli (CS) and a 108dB, 40-  
6 millisecond broadband noise startle probe alone (NA) are presented to familiarize participants.  
7  
8 Next, participants undergo a 36-trial conditioning phase, with 3 blocks of 12 trials: 4 reinforced  
9 CS (CS+), 4 nonreinforced CS (CS-), and 4 NA trials. CS are presented on a computer monitor  
10 for 6 seconds; the startle probe is delivered binaurally via headphones on every trial after 6  
11 seconds. During conditioning, only the CS+ is reinforced with an unconditioned stimulus (US)  
12 on every trial. The US is a 250-millisecond airblast of 140psi intensity directed at the larynx,  
13 which has consistently produced robust FPS.<sup>43 80</sup> On the CS+ trials, the US co-terminates with  
14 the CS+ 0.5 seconds following the startle probe; CS- trials terminate immediately after the startle  
15 probe. After a 10-minute break, participants undergo the 72-trial Fear Extinction phase: 6 blocks  
16 of 4 trials of each type (CS+, CS-, NA). During Extinction, the CS+ is presented without the US.  
17 Inter-trial intervals are randomized to be 9-22 seconds for Fear Acquisition and Extinction.  
18  
19

20  
21  
22  
23  
24  
25  
26  
27  
28  
29  
30  
31  
32  
33  
34  
35  
36  
37  
38  
39  
40  
41  
42  
43  
44  
45  
46  
47  
48  
49  
50  
51  
52  
53  
54  
55  
56  
57  
58  
59  
60  
Psychophysiological fear responses are collected using Biopac MP160 electromyography  
(EMG) and SC wireless modules; ECG is also recorded. FPS is measured through corrugator and  
orbicularis EMG. Startle magnitude is assessed as the peak amplitude of EMG contraction 20-  
200ms following the startle probe. SC data are collected using electrodes on the hypothenar  
surface of the non-dominant hand to measure sympathetic arousal. Psychophysiological data are  
filtered, rectified, and smoothed using MindWare software. Several indicators of  
psychophysiological fear responses are calculated, including: 1) FPS to the CS+ during early  
extinction (fear load<sup>80</sup>), 2) FPS to the CS+ during late extinction, and 3) FPS to the CS- during  
late fear acquisition. These measures reflect expression of conditioned fear, fear inhibition, and



1  
2  
3 fear discrimination.<sup>80-82</sup> FPS is calculated by subtracting startle magnitude to the NA from startle  
4 magnitude to the CS in each block to account for individual differences in startle magnitude and  
5 habituation. Comparable scores for SC response are secondary predictors. Although frequently  
6 used to index fear, SC response may be a more nonspecific measure of arousal that is not as  
7 closely tied to fear neurocircuitry as FPS.<sup>82-84</sup> SC response is calculated by subtracting SC prior  
8 to stimulus onset from maximum SC during CS presentation.  
9

10  
11  
12  
13  
14  
15  
16  
17 Posttraumatic dysphoria is assessed with an established and reliable eye-tracking  
18 paradigm adapted for dysphoria.<sup>85</sup> Attention allocation is measured using a remote high-speed  
19 eye-tracker (EyeLink Portable Duo). The task consists of free-viewing 4x4 matrices of  
20 NimStim<sup>86</sup> happy and sad faces. Trials begin with a fixation cross, shown until a 1000-  
21 millisecond fixation is recorded, to verify trials begin with gaze fixated at the matrix's center.  
22 Matrices are presented for 6000 milliseconds, followed by a 2000-millisecond inter-trial interval.  
23 Participants view 60 different matrices, presented in 2 blocks of 30 each, with a 60-second break  
24 between blocks. Eye-tracking data are used to define fixations as 100 milliseconds+ of stable  
25 fixation within 1-degree visual angle. Dwell time for Areas of Interest (AOIs)—one each for sad  
26 and happy faces—are calculated for each matrix. Total dwell time for each AOI averages dwell  
27 times across the 60 matrices.  
28  
29  
30  
31  
32  
33  
34  
35  
36  
37  
38  
39  
40  
41

### 42 ***Follow-up Visit***

43  
44  
45 Approximately two years after the baseline laboratory visit, participants return to UCLA  
46 for a follow-up. All participants are invited to return; we aim to re-evaluate at least 80  
47 individuals (40+ each in the PTSD and control groups). At follow-up, participants repeat all  
48 procedures from the baseline laboratory visit. Research personnel administer the CAPS-5 to  
49 assess past-month PTSD and the SCID-5 to assess psychopathology experienced since baseline.  
50  
51  
52  
53  
54  
55  
56  
57  
58  
59  
60

1  
2  
3 Medical history, medications, health behaviors, PTSD and depressive symptoms, and sleep are  
4 also queried.  
5  
6

## 7 **Outcome Measures**

### 8 *Main Outcomes*

9  
10 **Brachial Artery FMD.** Our primary outcome is brachial artery FMD. As described  
11 above, pulsed Doppler velocity signals are obtained at baseline and after cuff deflation using the  
12 UNEXEF38G ultrasonography system. FMD is the percent difference in brachial artery  
13 diameter, before and after occlusion.  
14  
15

16  
17 **EMPs.** Circulating EMPs expressing CD62E and CD31 (endothelial cell activation and  
18 apoptosis, respectively)<sup>24</sup> assessed using flow cytometry are secondary outcome measures. EMP  
19 sample preparation is completed within two hours of blood draw, as previously described.<sup>87-90</sup>  
20  
21 Citrated blood is centrifuged at 160g at 4°C for 10 minutes to obtain platelet-rich plasma, which  
22 is further centrifuged at 1500g at 4°C for 6 minutes to yield platelet-poor plasma. Fifty  
23 microliters of platelet-poor plasma are each incubated in two sets: 1) 4µL of brilliant violet 421  
24 (BV421)-conjugated monoclonal antibody to CD62E (BD), 4µL of phycoerythrin (PE)-  
25 conjugated monoclonal antibody to CD31 (BD), 4µL of fluorescein isothiocyanate (FITC)-  
26 conjugated monoclonal antibody to CD42b (BD), and 2) 4µL of PE-conjugated monoclonal  
27 antibody to CD31, 4µL of FITC-conjugated Annexin V (BD). EMPs are the number of particles  
28 with size <1.5µm 1) positively labeled by CD62E, 2) positively labeled by CD31 and negatively  
29 labeled by CD42b, and 3) positively labeled by CD31 and Annexin V. Allophycocyanin (APC)-  
30 conjugated monoclonal antibody CD45 (a pan-leukocyte marker; BD) is used to exclude  
31 contamination by leukocyte microparticles.<sup>88</sup> Negative controls include the appropriate FITC-  
32  
33  
34  
35  
36  
37  
38  
39  
40  
41  
42  
43  
44  
45  
46  
47  
48  
49  
50  
51  
52  
53  
54  
55  
56  
57  
58  
59  
60

1  
2  
3 labeled, PE-labeled, BV421-labeled, and APC-labeled isotype-matched IgG. EMPs are  
4  
5 quantified as the number of EMPs per  $\mu\text{L}$  (ThermoFisher Attune NxT Flow Cytometer).  
6

### 7 8 **Potential Pathway Variables**

9  
10 We are exploring autonomic imbalance, inflammation, and oxidative stress as potential  
11  
12 mechanisms linking PTSD and its dimensions with endothelial dysfunction. Average respiratory  
13  
14 sinus arrhythmia (RSA) amplitude across the cycles of the HRDB task—defined as the  
15  
16 difference between the end of expiration and end of inspiration in heart rate—reflects  
17  
18 parasympathetic-mediated cardiac control.<sup>79 91</sup> Blood-based inflammatory markers are assayed  
19  
20 from plasma, including high-sensitivity C-reactive protein measured by ELISA (R&D Systems).  
21  
22 Interleukin (IL)-6, IL-8, IL-10, tumor necrosis factor- $\alpha$ , and interferon-gamma are measured in a  
23  
24 multiplex assay utilizing a V-PLEX Custom Human Cytokine Proinflammatory Panel on the  
25  
26 Meso Scale Discovery electrochemiluminescence platform. Oxidative stress is assessed by  
27  
28 measuring urinary F2-isoprostanes using an ELISA (Oxford Biomedical Research).  
29  
30  
31

### 32 33 **Statistical Analyses**

34  
35 We will first conduct cross-sectional associations of PTSD and its dimensions with  
36  
37 endothelial dysfunction; longitudinal associations will be considered in exploratory analyses.  
38  
39 For cross-sectional analyses, two sample t-tests will compare participants with and without  
40  
41 PTSD on 1) FMD and 2) EMPs expressing CD62E and CD31. We will extend these analyses  
42  
43 using linear regression models adjusting for covariates (described below). We will consider total  
44  
45 PTSD severity score as a continuous predictor. Second, objective measures of posttraumatic fear  
46  
47 (e.g., fear load based on FPS) will be the exposures in cross-sectional linear regression analyses  
48  
49 of FMD and EMP outcomes. Additionally, we will explore objective measures of posttraumatic  
50  
51 dysphoria as predictors of endothelial dysfunction. The approach for these analyses will mirror  
52  
53  
54  
55  
56  
57  
58  
59

1  
2  
3 that for posttraumatic fear, with exposures operationalized as total dwell times for the sad and  
4  
5 happy AOIs.  
6

7  
8 For longitudinal analyses, we will first examine how measures of PTSD and its  
9  
10 dimensions at baseline predict change in FMD using linear regression. Second, we will examine  
11  
12 how changes in PTSD and its dimensions over follow-up predict change in FMD using linear  
13  
14 regression. Analyses will consider EMPs as secondary outcomes. For longitudinal analyses,  
15  
16 FMD at the follow-up assessment will be the outcome, and FMD at the baseline assessment will  
17  
18 be included as a covariate.  
19  
20

21  
22 To examine if autonomic imbalance, inflammation, and oxidative stress explain  
23  
24 associations of PTSD and its dimensions with endothelial dysfunction in cross-sectional and/or  
25  
26 longitudinal analyses, we will estimate total and direct effects of measures of PTSD and its  
27  
28 dimensions on endothelial dysfunction and test for significant indirect effects using  
29  
30 bootstrapping methods.<sup>92</sup>  
31  
32

33  
34 For all analyses, we will examine a series of adjusted models. The base adjusted model  
35  
36 will include age, gender, race, and ethnicity; subsequent models will sequentially adjust for: 1)  
37  
38 other sociodemographics (e.g., education, marital status); 2) CVD medical risk factors (e.g.,  
39  
40 diabetes, hypertension); 3) medications (e.g., medication for hypertension, hyperlipidemia); and  
41  
42 4) anthropometrics and health behaviors (e.g., body mass index, smoking). To avoid overfitting,  
43  
44 we will fit group lasso regression, which performs variable selection and regularization of  
45  
46 regression coefficients, to identify important predictors of endothelial dysfunction and improve  
47  
48 model interpretability.<sup>93</sup>  
49  
50

## 51 **Sample Size Estimation and Power**

52  
53  
54  
55  
56  
57  
58  
59  
60

Analyses are powered to our primary outcome, FMD, and we used the smallest effect size from prior research to be conservative in our calculations. Specifically, we estimated our effect size based on Cohen's  $d=0.48$  for the difference in percent change in FMD in patients with versus without probable PTSD.<sup>28</sup> Power analysis for a two sample  $t$ -test was conducted to determine a sufficient sample size using an alpha of .05, power of .80, a medium effect size (Cohen's  $d=0.48$ ), two tails, and equal allocations of participants to the PTSD and trauma control groups. Based on these assumptions, the desired sample size was 70 participants per group. We conservatively selected 80 participants per group.

Given our hypothesis that psychophysiological fear is the key PTSD dimension that will relate to endothelial dysfunction, we considered power for this analysis based on our primary exposure for this aim: FPS. We assumed a standard deviation (SD) of 70 for FPS scores<sup>80</sup> and a SD of 3.5% for FMD.<sup>28</sup> With  $N=160$  and a two-sided significance level of .05, we have 80% power to detect a change of 0.011% in FMD for each unit of FPS score increase.<sup>94</sup> This is a small effect size,<sup>28</sup> so our sample is large enough to model psychophysiological fear and FMD in adjusted models.

### **Ethics and dissemination**

This study is conducted in compliance with the UCLA Institutional Review Board and the Helsinki Declaration. Participants sign informed consent and Health Insurance Portability and Accountability Act Authorization for Research forms at enrollment. Research personnel review the study in detail and answer questions. Individuals are informed that participation is optional and that they may withdraw at any time. After individuals are fully informed about study procedures, participants who elect to proceed with the study sign the consent document, as do research personnel. The findings of this study will be disseminated online (e.g.,

1  
2  
3 ClinicalTrials.gov, Open Science Framework), presented at academic conferences, and published  
4  
5 in peer-reviewed journals.  
6

### 7 **Patient and public involvement**

8  
9  
10 Patients and the public were not involved in the design or conduct of the study. We plan  
11  
12 to share findings with the public through dissemination to community partners.  
13

## 14 **DISCUSSION**

15  
16  
17 To our knowledge, this is the first study to comprehensively investigate the ways in  
18  
19 which PTSD and dimensions of posttraumatic stress relate to endothelial dysfunction, one of the  
20  
21 earliest modifiable precursors to CVD. To distill pathways by which posttraumatic stress may  
22  
23 lead to CVD risk, we focus on psychophysiological fear—a key dimension of PTSD—although  
24  
25 we consider objective measures of dysphoria, a more nonspecific dimension. This study  
26  
27 incorporates state-of-the-art measures of endothelial dysfunction by investigating both brachial  
28  
29 artery FMD and, secondarily, EMPs. No investigation of trauma-exposed individuals has  
30  
31 considered functional and cellular measures of endothelial dysfunction as we do here.  
32  
33 Furthermore, unlike prior research with predominantly white, male samples,<sup>27 28</sup> this study will  
34  
35 include men and women of diverse racial/ethnic backgrounds who have been exposed to a range  
36  
37 of traumas, increasing the generalizability of findings.  
38  
39  
40

41  
42 Despite these strengths, there are possible limitations. All assessments are conducted in  
43  
44 the laboratory, which offers a controlled setting that enhances internal validity but may limit the  
45  
46 generalizability of findings to real-world settings. Additionally, although we use state-of-the-art  
47  
48 measures of endothelial dysfunction, neither metric indicates endothelial function reactivity to  
49  
50 trauma-related cues. Further research using provocation measures or assessing cardiovascular  
51  
52 reactivity in naturalistic settings is needed to address this issue.  
53  
54  
55  
56  
57  
58  
59  
60

1  
2  
3 PTSD predicts incident CVD, but the field needs intervention targets and intermediary  
4  
5 mechanisms to determine if PTSD interventions can offset CVD risk. This study will test  
6  
7 whether endothelial dysfunction could be an early subclinical mechanism by which PTSD  
8  
9 increases CVD risk, and whether posttraumatic fear or another dimension could be the target to  
10  
11 offset that risk in vulnerable, trauma-exposed individuals.  
12  
13  
14  
15  
16  
17  
18  
19  
20  
21  
22  
23  
24  
25  
26  
27  
28  
29  
30  
31  
32  
33  
34  
35  
36  
37  
38  
39  
40  
41  
42  
43  
44  
45  
46  
47  
48  
49  
50  
51  
52  
53  
54  
55  
56  
57  
58  
59  
60

## AUTHOR CONTRIBUTIONS

### **Contributors:**

JAS, DS, YN, AL, OAA, RE, TH, and KW-T contributed significantly to the planning, conception, design, and successful funding of this study. SC, KR, JT, JAS, and KW-T are contributing significantly to the acquisition of data. SC, KR, and JAS drafted the initial version of this manuscript. AKM, DS, YN, AL, OAA, RE, TH, and JAS will be involved in the analyses and interpretation of the data. All authors revised the draft critically for important intellectual content and gave final approval for this version of the manuscript to be submitted for publication.

### **Author Details:**

Shiloh Cleveland and Kristina Reed contributed equally to this work.



## FUNDING STATEMENT

This study is supported by National Heart, Lung, and Blood Institute (NHLBI) grant number R01HL139614.

### **Disclaimer:**

The content is solely the responsibility of the authors and does not necessarily represent the official views of the National Institutes of Health.

For peer review only

## COMPETING INTERESTS

There are no competing interests declared for this study.

For peer review only

## REFERENCES

1. Virani SS, Alonso A, Benjamin EJ, et al. Heart disease and stroke statistics-2020 update: a report from the American Heart Association. *Circulation* 2020;141:e139-e596. doi:10.1161/CIR.0000000000000757 [published Online First: 2020/01/29].
2. Kessler RC, Sonnega A, Bromet E, et al. Posttraumatic stress disorder in the National Comorbidity Survey. *Arch Gen Psychiatry* 1995;52:1048-60. doi:10.1001/archpsyc.1995.03950240066012.
3. Kilpatrick DG, Resnick HS, Milanak ME, et al. National estimates of exposure to traumatic events and PTSD prevalence using DSM-IV and DSM-5 criteria. *J Trauma Stress* 2013;26:537-47. doi:10.1002/jts.21848
4. American Psychiatric Association. Diagnostic and statistical manual of mental disorders, fifth edition (DSM-5). Washington, DC: American Psychiatric Association 2013.
5. Sumner JA, Kubzansky LD, Elkind MS, et al. Trauma exposure and posttraumatic stress disorder symptoms predict onset of cardiovascular events in women. *Circulation* 2015;132:251-9. doi:10.1161/circulationaha.114.014492 [published Online First: 2015/06/29].
6. Kubzansky LD, Koenen KC, Jones C, et al. A prospective study of posttraumatic stress disorder symptoms and coronary heart disease in women. *Health Psychol* 2009;28(1):125-30. doi:10.1037/0278-6133.28.1.125.
7. Kubzansky LD, Koenen KC, Spiro A, 3rd, et al. Prospective study of posttraumatic stress disorder symptoms and coronary heart disease in the Normative Aging Study. *Arch Gen Psychiatry* 2007;64(1):109-16. doi:10.1001/archpsyc.64.1.109.

- 1  
2  
3 8. Vaccarino V, Goldberg J, Rooks C, et al. Post-traumatic stress disorder and incidence of  
4 coronary heart disease: a twin study. *J Am Coll Cardiol* 2013;62(11):970-8.  
5  
6 doi:10.1016/j.jacc.2013.04.085 [published Online First: 2013/07/03].  
7  
8  
9
- 10 9. Boscarino JA. A prospective study of PTSD and early-age heart disease mortality among  
11 Vietnam veterans: implications for surveillance and prevention. *Psychosom Med*  
12 2008;70(6):668-76. doi:10.1097/PSY.0b013e31817bccaf [published Online First:  
13 2008/07/04].  
14  
15  
16  
17  
18
- 19 10. Gradus JL, Farkas DK, Svensson E, et al. Associations between stress disorders and  
20 cardiovascular disease events in the Danish population. *BMJ Open* 2015;5(12):e009334.  
21  
22 doi:10.1136/bmjopen-2015-009334.  
23  
24  
25
- 26 11. Edmondson D, Kronish IM, Shaffer JA, et al. Posttraumatic stress disorder and risk for  
27 coronary heart disease: a meta-analytic review. *Am Heart J* 2013;166(5):806-14.  
28  
29 doi:10.1016/j.ahj.2013.07.031 [published Online First: 2013/9/24].  
30  
31  
32
- 33 12. Scott KM, Koenen KC, Aguilar-Gaxiola S, et al. Associations between lifetime traumatic  
34 events and subsequent chronic physical conditions: a cross-national, cross-sectional  
35 study. *PLoS One* 2013;8(11):e80573. doi:10.1371/journal.pone.0080573.  
36  
37  
38  
39
- 40 13. Atwoli L, Platt JM, Basu A, et al. Associations between lifetime potentially traumatic events  
41 and chronic physical conditions in the South African Stress and Health Survey: a cross-  
42 sectional study. *BMC Psychiatry* 2016;16:214. doi:10.1186/s12888-016-0929-z.  
43  
44  
45  
46
- 47 14. Pietrzak RH, Goldstein RB, Southwick SM, et al. Physical health conditions associated with  
48 posttraumatic stress disorder in U.S. older adults: results from wave 2 of the National  
49 Epidemiologic Survey on Alcohol and Related Conditions. *J Am Geriatr Soc*  
50  
51  
52  
53  
54  
55  
56  
57  
58  
59

- 2012;60(2):296-303. doi:10.1111/j.1532-5415.2011.03788.x [published Online First: 2012/01/27].
15. Burg MM, Soufer R. Post-traumatic stress disorder and cardiovascular disease. *Curr Cardiol Rep* 2016;18(10):94. doi:10.1007/s11886-016-0770-5.
16. Flammer AJ, Anderson T, Celermajer DS, et al. The assessment of endothelial function: from research into clinical practice. *Circulation* 2012;126(6):753-67. doi:10.1161/circulationaha.112.093245.
17. Shimbo D, Grahame-Clarke C, Miyake Y, et al. The association between endothelial dysfunction and cardiovascular outcomes in a population-based multi-ethnic cohort. *Atherosclerosis* 2007;192(1):197-203. doi:10.1016/j.atherosclerosis.2006.05.005 [published Online First: 2006/06/08].
18. Ras RT, Streppel MT, Draijer R, et al. Flow-mediated dilation and cardiovascular risk prediction: a systematic review with meta-analysis. *Int J Cardiol* 2013;168(1):344-51. doi:10.1016/j.ijcard.2012.09.047 [published Online First: 2012/10/04].
19. Matsuzawa Y, Kwon TG, Lennon RJ, et al. Prognostic value of flow-mediated vasodilation in brachial artery and fingertip artery for cardiovascular events: a systematic review and meta-analysis. *J Am Heart Assoc* 2015;4(11):e002270. doi:10.1161/jaha.115.002270.
20. Inaba Y, Chen JA, Bergmann SR. Prediction of future cardiovascular outcomes by flow-mediated vasodilatation of brachial artery: a meta-analysis. *Int J Cardiovasc Imaging* 2010;26(6):631-40. doi:10.1007/s10554-010-9616-1 [published Online First: 2010/03/26].
21. Deanfield JE, Halcox JP, Rabelink TJ. Endothelial function and dysfunction: testing and clinical relevance. *Circulation* 2007;115(10):1285-95. doi:10.1161/circulationaha.106.652859.

- 1  
2  
3 22. Mallat Z, Benamer H, Hugel B, et al. Elevated levels of shed membrane microparticles with  
4  
5 procoagulant potential in the peripheral circulating blood of patients with acute coronary  
6  
7 syndromes. *Circulation* 2000;101(8):841-3. doi:10.1161/01.cir.101.8.841.  
8  
9
- 10 23. Lynch SF, Ludlam CA. Plasma microparticles and vascular disorders. *Br J Haematol*  
11  
12 2007;137(1):36-48. doi:10.1111/j.1365-2141.2007.06514.x.  
13  
14
- 15 24. Jimenez JJ, Jy W, Mauro LM, et al. Endothelial cells release phenotypically and  
16  
17 quantitatively distinct microparticles in activation and apoptosis. *Thromb Res*  
18  
19 2003;109(4):175-80. doi:10.1016/s0049-3848(03)00064-1.  
20  
21
- 22 25. Celermajer D, Sorensen K, Georgakopoulos D, et al. Cigarette smoking is associated with  
23  
24 dose-related and potentially reversible impairment of endothelium-dependent dilation in  
25  
26 healthy young adults. *Circulation*. 1993;88(5 Pt 1):2149-55. doi:10.1161/01.cir.88.5.2149  
27  
28
- 29 26. Modena MG, Bonetti L, Coppi F, et al. Prognostic role of reversible endothelial dysfunction  
30  
31 in hypertensive postmenopausal women. *J Am Coll Cardiol* 2002;40(3):505-10.  
32  
33 doi:10.1016/s0735-1097(02)01976-9.  
34
- 35 27. Kitta Y, Obata JE, Nakamura T, et al. Persistent impairment of endothelial vasomotor  
36  
37 function has a negative impact on outcome in patients with coronary artery disease. *J Am*  
38  
39 *Coll Cardiol* 2009;53(4):323-30. doi:10.1016/j.jacc.2008.08.074.  
40  
41
- 42 28. Grenon SM, Owens CD, Alley H, et al. Posttraumatic stress disorder is associated with worse  
43  
44 endothelial function among veterans. *J Am Heart Assoc* 2016;5(3):e003010.  
45  
46 doi:10.1161/jaha.115.003010.  
47  
48
- 49 29. Violanti JM, Andrew ME, Burchfiel CM, et al. Posttraumatic stress symptoms and  
50  
51 subclinical cardiovascular disease in police officers. *Int J Stress Manag* 2006;13(4):541-  
52  
53 54. doi:10.1037/1072-5245.13.4.541  
54  
55  
56  
57  
58  
59  
60

- 1  
2  
3 30. Thurston RC, Barinas-Mitchell E, von Känel R, et al. Trauma exposure and endothelial  
4 function among midlife women. *Menopause* 2018;25(4):368-74.  
5  
6 doi:10.1097/gme.0000000000001036  
7  
8  
9  
10 31. Plantinga L, Bremner JD, Miller AH, et al. Association between posttraumatic stress disorder  
11 and inflammation: a twin study. *Brain Behav Immun* 2013;30:125-32.  
12  
13 doi:10.1016/j.bbi.2013.01.081 [published Online First: 2013/02/04]  
14  
15  
16 32. von Känel R, Hepp U, Traber R, et al. Measures of endothelial dysfunction in plasma of  
17 patients with posttraumatic stress disorder. *Psychiatry Res* 2008;158(3):363-73.  
18  
19 doi:10.1016/j.psychres.2006.12.003  
20  
21  
22 33. Galatzer-Levy IR, Bryant RA. 636,120 ways to have posttraumatic stress disorder. *Perspect*  
23 *Psychol Sci* 2013;8(6):651-62. doi:10.1177/1745691613504115.  
24  
25  
26 34. Zoellner LA, Pruitt LD, Farach FJ, et al. Understanding heterogeneity in PTSD: fear,  
27 dysphoria, and distress. *Depress Anxiety* 2014;31(2):97-106. doi:10.1002/da.22133  
28  
29 [published Online First: 2013/06/12]  
30  
31  
32 35. Bryant RA, Creamer M, O'Donnell M, et al. Acute and chronic posttraumatic stress  
33 symptoms in the emergence of posttraumatic stress disorder: a network analysis. *JAMA*  
34 *Psychiatry* 2017;74(2):135-42. doi:10.1001/jamapsychiatry.2016.3470.  
35  
36  
37 36. Forbes D, Parslow R, Creamer M, et al. A longitudinal analysis of posttraumatic stress  
38 disorder symptoms and their relationship with fear and anxious-misery disorders:  
39 implications for DSM-V. *J Affect Disord* 2010;127(1-3):147-52.  
40  
41 doi:10.1016/j.jad.2010.05.005 [published Online First: 2010/06/03].  
42  
43  
44 37. Gros DF, Simms LJ, Acierno R. Specificity of posttraumatic stress disorder symptoms: an  
45 investigation of comorbidity between posttraumatic stress disorder symptoms and  
46  
47  
48  
49  
50  
51  
52  
53  
54  
55  
56  
57  
58  
59  
60

- 1  
2  
3 depression in treatment-seeking veterans. *J Nerv Ment Dis* 2010;198(12): 885-90.  
4  
5 doi:10.1097/NMD.0b013e3181fe7410  
6  
7  
8 38. Foa EB, Kozak MJ. Emotional processing of fear: exposure to corrective information.  
9  
10 *Psychol Bull* 1986;99(1):20-35.  
11  
12 39. Duits P, Cath DC, Lissek S, et al. Updated meta-analysis of classical fear conditioning in the  
13  
14 anxiety disorders. *Depress Anxiety* 2015;32(4):239-53. doi: 10.1002/da.22353 [published  
15  
16 Online First: 2015/02/20].  
17  
18 40. Jovanovic T, Kazama A, Bachevalier J, et al. Impaired safety signal learning may be a  
19  
20 biomarker of PTSD. *Neuropharmacology* 2012;62(2):695-704.  
21  
22 doi:10.1016/j.neuropharm.2011.02.023 [published Online First: 2011/03/04].  
23  
24 41. Jovanovic T, Norrholm SD. Neural mechanisms of impaired fear inhibition in posttraumatic  
25  
26 stress disorder. *Front Behav Neurosci* 2011;5:44. doi:10.3389/fnbeh.2011.00044.  
27  
28 42. Jovanovic T, Norrholm SD, Blanding NQ, et al. Impaired fear inhibition is a biomarker of  
29  
30 PTSD but not depression. *Depress Anxiety* 2010;27(3):244-51. doi:10.1002/da.20663.  
31  
32 43. Norrholm SD, Jovanovic T, Olin IW, et al. Fear extinction in traumatized civilians with  
33  
34 posttraumatic stress disorder: relation to symptom severity. *Biol Psychiatry*  
35  
36 2011;69(6):556-63. doi:10.1016/j.biopsych.2010.09.013 [published Online First:  
37  
38 2010/10/29]  
39  
40 44. Peri T, Ben-Shakhar G, Orr SP, et al. Psychophysiologic assessment of aversive conditioning  
41  
42 in posttraumatic stress disorder. *Biol Psychiatry* 2000;47(6):512-9. doi:10.1016/s0006-  
43  
44 3223(99)00144-4.  
45  
46 45. Blechert J, Michael T, Vriends N, et al. Fear conditioning in posttraumatic stress disorder:  
47  
48 evidence for delayed extinction of autonomic, experiential, and behavioural responses.  
49  
50  
51  
52  
53  
54  
55  
56  
57  
58  
59  
60



- 1  
2  
3 *Behav Res Ther* 2007;45(9):2019-33. doi:10.1016/j.brat.2007.02.012 [published Online  
4  
5 First: 2007/03/12].  
6  
7
- 8 46. Roy MJ, Costanzo M, Leaman S. Psychophysiologic identification of subthreshold PTSD in  
9  
10 combat veterans. *Stud Health Technol Inform* 2012;181:149-55.  
11  
12
- 13 47. Costanzo M, Jovanovic T, Norrholm SD, et al. Psychophysiological investigation of combat  
14  
15 veterans with subthreshold post-traumatic stress disorder symptoms. *Mil Med*  
16  
17 2016;181(8):793-802. doi:10.7205/milmed-d-14-00671.  
18  
19
- 20 48. Thayer JF, Yamamoto SS, Brosschot JF. The relationship of autonomic imbalance, heart rate  
21  
22 variability and cardiovascular disease risk factors. *Int J Cardiol* 2010;141(2):122-31.  
23  
24 doi:10.1016/j.ijcard.2009.09.543 [published Online First: 2009/11/11].  
25  
26
- 27 49. Ruiz-Padial E, Sollers JJ 3rd, Vila J, et al. The rhythm of the heart in the blink of an eye:  
28  
29 emotion-modulated startle magnitude covaries with heart rate variability.  
30  
31 *Psychophysiology* 2003;40(2):306-13. doi:10.1111/1469-8986.00032.  
32  
33
- 34 50. Melzig CA, Weike AI, Hamm AO, et al. Individual differences in fear-potentiated startle as a  
35  
36 function of resting heart rate variability: implications for panic disorder. *Int J*  
37  
38 *Psychophysiol* 2009;71(2):109-17. doi:10.1016/j.ijpsycho.2008.07.013 [published Online  
39  
40 First: 2008/07/28]  
41  
42
- 43 51. O'Donovan A, Ahmadian AJ, Neylan TC, et al. Current posttraumatic stress disorder and  
44  
45 exaggerated threat sensitivity associated with elevated inflammation in the Mind Your  
46  
47 Heart Study. *Brain Behav Immun* 2017;60:198-205. doi:10.1016/j.bbi.2016.10.014  
48  
49 [published Online First: 2016/10/17]  
50  
51
- 52 52. Michopoulos V, Rothbaum AO, Jovanovic T, et al. Association of CRP genetic variation and  
53  
54 CRP level with elevated PTSD symptoms and physiological responses in a civilian  
55  
56  
57  
58  
59  
60

- 1  
2  
3 population with high levels of trauma. *Am J Psychiatry* 2015;172(4):353-62.  
4  
5 doi:10.1176/appi.ajp.2014.14020263 [published Online First: 2014/12/12]  
6  
7  
8 53. Miller MW, Sadeh N. Traumatic stress, oxidative stress and post-traumatic stress disorder:  
9  
10 neurodegeneration and the accelerated-aging hypothesis. *Mol Psychiatry*  
11  
12 2014;19(11):1156-62. doi:10.1038/mp.2014.111 [published Online First: 2014/09/23].  
13  
14  
15 54. Wentworth BA, Stein MB, Redwine LS, et al. Post-traumatic stress disorder: a fast track to  
16  
17 premature cardiovascular disease? *Cardiol Rev* 2013;21(1):16-22.  
18  
19 doi:10.1097/CRD.0b013e318265343b.  
20  
21  
22 55. Weathers FW, Blake DD, Schnurr P, et al. The Clinician-Administered PTSD Scale for  
23  
24 DSM-5 (CAPS-5). National Center for PTSD. 2013. <http://www.ptsd.va.gov>.  
25  
26  
27 56. Schnurr PP, Chard KM, Ruzek JI, et al. Design of VA Cooperative Study #591: CERV-  
28  
29 PTSD, comparative effectiveness research in veterans with PTSD. *Contemp Clin Trials*  
30  
31 2015;41:75-84. doi:10.1016/j.cct.2014.11.017 [published Online First: 2014/11/29].  
32  
33  
34 57. Rovner BW, Folstein MF. Mini-mental state exam in clinical practice. *Hosp Pract (Off Ed)*  
35  
36 1987;22(1a):99, 103, 06, 10.  
37  
38  
39 58. Weathers F, Blake D, Schnurr P, et al. The Life Events Checklist for DSM-5 (LEC-5).  
40  
41 National Center for PTSD. 2013. <http://www.ptsd.va.gov>.  
42  
43  
44 59. Weathers F, Litz B, Keane T, et al. The PTSD Checklist for DSM-5 (PCL-5). National  
45  
46 Center for PTSD. 2013. <http://www.ptsd.va.gov>.  
47  
48  
49 60. Ozer EJ, Best SR, Lipsey TL, Weiss DS. Predictors of posttraumatic stress disorder and  
50  
51 symptoms in adults: a meta-analysis. *Psychol Bull* 2003;129(1):52-73. doi:  
52  
53 10.1037/0033-2909.129.1.52  
54  
55  
56  
57  
58  
59  
60

- 1  
2  
3 61. Weathers FW, Bovin MJ, Lee DJ, et al. The Clinician-Administered PTSD Scale for DSM-5  
4  
5 (CAPS-5): development and initial psychometric evaluation in military veterans. *Psychol*  
6  
7 *Assess* 2018;30(3):383-95. doi:10.1037/pas0000486 [published Online First:  
8  
9 2017/05/12].  
10  
11
- 12 62. First M, Williams J, Karg R, et al. Structured clinical interview for DSM-5—Research  
13  
14 version (SCID-5 for DSM-5, research version; SCID-5-RV). Arlington, VA: American  
15  
16 Psychiatric Association 2015.  
17  
18
- 19 63. Bernstein DP, Fink L, Handelsman L, et al. Initial reliability and validity of a new  
20  
21 retrospective measure of child abuse and neglect. *Am J Psychiatry* 1994;151(8):1132-6.  
22  
23 doi:10.1176/ajp.151.8.1132  
24  
25
- 26 64. Bifulco A, Brown GW, Harris TO. Childhood Experience of Care and Abuse (CECA): a  
27  
28 retrospective interview measure. *J Child Psychol Psychiatry* 1994;35(8):1419-35.  
29  
30 doi:10.1111/j.1469-7610.1994.tb01284.x  
31  
32
- 33 65. Straus MA. Measuring intrafamily conflict and violence: The Conflict Tactics (CT) Scales. *J*  
34  
35 *Marriage Fam* 1979;41(1):75-88. doi:10.2307/351733  
36  
37
- 38 66. Blumberg SJ, Bialostosky K, Hamilton WL, et al. The effectiveness of a short form of the  
39  
40 Household Food Security Scale. *Am J Public Health* 1999;89(8):1231-4.  
41  
42 doi:10.2105/ajph.89.8.1231  
43  
44
- 45 67. Bovin MJ, Marx BP, Weathers FW, et al. Psychometric properties of the PTSD Checklist for  
46  
47 Diagnostic and Statistical Manual of Mental Disorders-Fifth Edition (PCL-5) in veterans.  
48  
49 *Psychol Assess* 2016;28(11):1379-91. doi:10.1037/pas0000254 [published Online First:  
50  
51 2015/12/14].  
52  
53  
54  
55  
56  
57  
58  
59  
60

- 1  
2  
3 68. Kroenke K, Strine TW, Spitzer RL, et al. The PHQ-8 as a measure of current depression in  
4 the general population. *J Affect Disord* 2009;114(1-3):163-73.  
5  
6 doi:10.1016/j.jad.2008.06.026 [published Online First: 2008/08/27].  
7  
8  
9  
10 69. Buysse DJ, Reynolds CF, 3rd, Monk TH, et al. The Pittsburgh Sleep Quality Index: a new  
11 instrument for psychiatric practice and research. *Psychiatry Res* 1989;28(2):193-213.  
12  
13 doi:10.1016/0165-1781(89)90047-4  
14  
15  
16  
17 70. Germain A, Hall M, Krakow B, et al. A brief sleep scale for Posttraumatic Stress Disorder:  
18 Pittsburgh Sleep Quality Index Addendum for PTSD. *J Anxiety Disord* 2005;19(2):233-  
19  
20 44. doi:10.1016/j.janxdis.2004.02.001 [published Online First: 2004/11/10].  
21  
22  
23  
24 71. Bastien CH, Vallieres A, Morin CM. Validation of the Insomnia Severity Index as an  
25 outcome measure for insomnia research. *Sleep Med* 2001;2(4):297-307.  
26  
27 doi:10.1016/s1389-9457(00)00065-4.  
28  
29  
30  
31 72. Buysse DJ. Sleep health: can we define it? Does it matter? *Sleep* 2014;37(1):9-17.  
32  
33 doi:10.5665/sleep.3298.  
34  
35  
36 73. Johnson ES, Dickerson JF, Vollmer WM, et al. The feasibility of matching on a propensity  
37 score for acupuncture in a prospective cohort study of patients with chronic pain. *BMC*  
38 *Med Res Methodol* 2017;17(1):42. doi:10.1186/s12874-017-0318-4  
39  
40  
41  
42 74. Takase B, Hattori H, Tanaka Y, et al. Acute effect of whole-body periodic acceleration on  
43 brachial flow-mediated vasodilatation assessed by a novel semi-automatic vessel chasing  
44 UNEXEF18G system. *J Cardiovasc Ultrasound* 2013;21(3):130-6.  
45  
46  
47 doi:10.4250/jcu.2013.21.3.130 [published Online First: 2013/09/30].  
48  
49  
50  
51  
52  
53  
54  
55  
56  
57  
58  
59  
60

- 1  
2  
3 75. Tomiyama H, Kohro T, Higashi Y, et al. A multicenter study design to assess the clinical  
4  
5 usefulness of semi-automatic measurement of flow-mediated vasodilatation of the  
6  
7 brachial artery. *Int Heart J* 2012;53(3):170-5. doi:10.1536/ihj.53.170.  
8  
9
- 10 76. Tomiyama H, Kohro T, Higashi Y, et al. Reliability of measurement of endothelial function  
11  
12 across multiple institutions and establishment of reference values in Japanese.  
13  
14 *Atherosclerosis* 2015;242(2):433-42. doi:10.1016/j.atherosclerosis.2015.08.001  
15  
16 [published Online First: 2015/08/05].  
17  
18
- 19 77. Thijssen DH, Black MA, Pyke KE, et al. Assessment of flow-mediated dilation in humans: a  
20  
21 methodological and physiological guideline. *Am J Physiol Heart Circ Physiol*  
22  
23 2011;300(1):H2-12. doi:10.1152/ajpheart.00471.2010 [published Online First:  
24  
25 2010/10/15].  
26  
27
- 28 78. Corretti MC, Anderson TJ, Benjamin EJ, et al. Guidelines for the ultrasound assessment of  
29  
30 endothelial-dependent flow-mediated vasodilation of the brachial artery: a report of the  
31  
32 International Brachial Artery Reactivity Task Force. *J Am Coll Cardiol* 2002;39(2):257-  
33  
34 65. doi:10.1016/s0735-1097(01)01746-6  
35  
36
- 37 79. Novak P. Quantitative autonomic testing. *J Vis Exp* 2011(53):e2502. doi:10.3791/2502  
38  
39
- 40 80. Norrholm SD, Glover EM, Stevens JS, et al. Fear load: the psychophysiological over-  
41  
42 expression of fear as an intermediate phenotype associated with trauma reactions. *Int J*  
43  
44 *Psychophysiol* 2015;98(2 Pt 2):270-75. doi:10.1016/j.ijpsycho.2014.11.005 [published  
45  
46 Online First: 2014/11/18].  
47  
48
- 49 81. Jovanovic T, Ely T, Fani N, et al. Reduced neural activation during an inhibition task is  
50  
51 associated with impaired fear inhibition in a traumatized civilian sample. *Cortex*  
52  
53  
54  
55  
56  
57  
58  
59  
60

- 2013;49(7):1884-91. doi:10.1016/j.cortex.2012.08.011 [published Online First: 2012/09/05].
82. Glover EM, Phifer JE, Crain DF, et al. Tools for translational neuroscience: PTSD is associated with heightened fear responses using acoustic startle but not skin conductance measures. *Depress Anxiety* 2011;28(12):1058-66. doi:10.1002/da.20880 [published Online First: 2011/09/02].
83. Davis M. The role of the amygdala in fear-potentiated startle: implications for animal models of anxiety. *Trends Pharmacol Sci* 1992;13(1):35-41. doi:10.1016/0165-6147(92)90014-w
84. Lonsdorf TB, Golkar A, Lindström KM, et al. BDNFval66met affects neural activation pattern during fear conditioning and 24 h delayed fear recall. *Soc Cogn Affect Neurosci* 2015;10(5):664-71. doi:10.1093/scan/nsu102 [published Online First: 2014/08/07].
85. Lazarov A, Ben-Zion Z, Shamai D, et al. Free viewing of sad and happy faces in depression: A potential target for attention bias modification. *J Affect Disord* 2018;238:94-100. doi:10.1016/j.jad.2018.05.047 [published Online First: 2018/05/29]
86. Tottenham N, Tanaka JW, Leon AC, et al. The NimStim set of facial expressions: judgments from untrained research participants. *Psychiatry Res* 2009;168(3):242-9. doi:10.1016/j.psychres.2008.05.006 [published Online First: 2009/06/28].
87. Jy W, Horstman LL, Jimenez JJ, et al. Measuring circulating cell-derived microparticles. *J Thromb Haemost* 2004;2(10):1842-51. doi:10.1111/j.1538-7836.2004.00936.x
88. Bernal-Mizrachi L, Jy W, Jimenez JJ, et al. High levels of circulating endothelial microparticles in patients with acute coronary syndromes. *Am Heart J* 2003;145(6):962-70. doi:10.1016/s0002-8703(03)00103-0

- 1  
2  
3 89. Garcia S, Chirinos J, Jimenez J, et al. Phenotypic assessment of endothelial microparticles in  
4 patients with heart failure and after heart transplantation: switch from cell activation to  
5 apoptosis. *J Heart Lung Transplant* 2005;24(12):2184-9.  
6  
7 doi:10.1016/j.healun.2005.07.006 [published Online First: 2005/11/02].  
8  
9  
10  
11  
12 90. Jimenez JJ, Jy W, Mauro LM, et al. Endothelial microparticles released in thrombotic  
13 thrombocytopenic purpura express von Willebrand factor and markers of endothelial  
14 activation. *Br J Haematol* 2003;123(5):896-902. doi: 10.1046/j.1365-2141.2003.04716.x  
15  
16  
17  
18  
19 91. Porges SW. Orienting in a defensive world: mammalian modifications of our evolutionary  
20 heritage. A Polyvagal Theory. *Psychophysiology* 1995;32(4):301-18. doi:10.1111/j.1469-  
21  
22 8986.1995.tb01213.x  
23  
24  
25  
26 92. Preacher KJ, Hayes AF. SPSS and SAS procedures for estimating indirect effects in simple  
27 mediation models. *Behav Res Methods Instrum Comput* 2004;36(4):717-31.  
28  
29 doi:10.3758/BF03206553  
30  
31  
32  
33 93. Tibshirani R. Regression shrinkage and selection via the lasso. *J R Statist Soc B*  
34 1996;58(1):267-88. doi:10.1111/j.2517-6161.1996.tb02080.x  
35  
36  
37  
38 94. Neter J, Wasserman W, Kutner M. Applied Linear Regression Models. Chicago, IL: Richard  
39 D. Irwin, Inc 1983.  
40  
41  
42  
43  
44  
45  
46  
47  
48  
49  
50  
51  
52  
53  
54  
55  
56  
57  
58  
59  
60

## FIGURE LEGENDS

Figure 1. Conceptual model for the study. The aim examining whether PTSD diagnosis is related to endothelial dysfunction is indicated by the dashed arrows. The aim examining associations of posttraumatic fear and dysphoria with endothelial dysfunction is indicated by the solid arrow. Mechanisms examined in exploratory analyses are printed above and below the solid arrow.

Figure 2. Study timeline. CAPS-5=Clinician-Administered PTSD Scale for *DSM-5*. CVD=cardiovascular disease. FMD=flow-mediated dilation. LEC-5=Life Events Checklist for *DSM-5*. PCL-5=PTSD Checklist for *DSM-5*. SCID-5=Structured Clinical Interview for *DSM-5*.



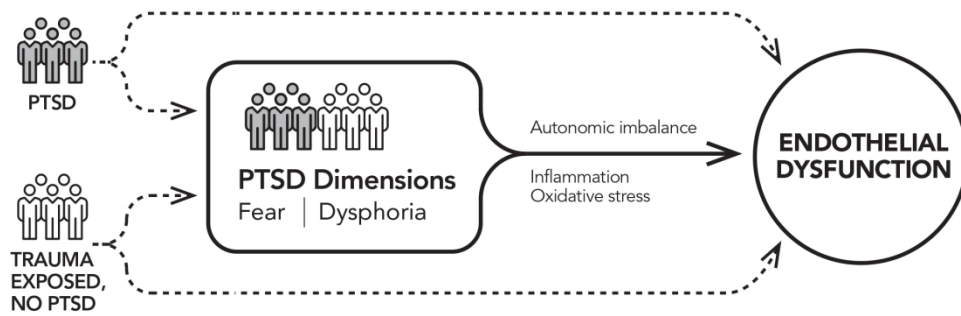

Figure 1. Conceptual model for the study. The aim examining whether PTSD diagnosis is related to endothelial dysfunction is indicated by the dashed arrows. The aim examining associations of posttraumatic fear and dysphoria with endothelial dysfunction is indicated by the solid arrow. Mechanisms examined in exploratory analyses are printed above and below the solid arrow.

176x61mm (300 x 300 DPI)

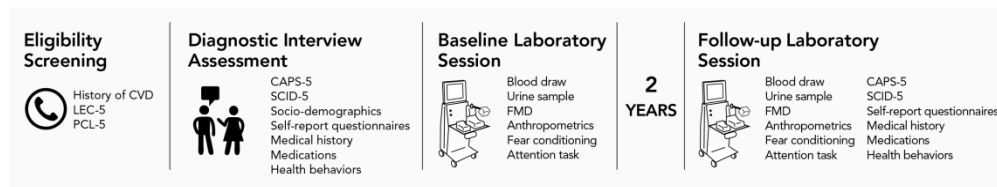

Figure 2. Study timeline. CAPS-5=Clinician-Administered PTSD Scale for DSM-5. CVD=cardiovascular disease. FMD=flow-mediated dilation. LEC-5=Life Events Checklist for DSM-5. PCL-5=PTSD Checklist for DSM-5. SCID-5=Structured Clinical Interview for DSM-5.

# BMJ Open

## Key Dimensions of Posttraumatic Stress Disorder and Endothelial Dysfunction: A Protocol for a Mechanism-Focused Cohort Study

|                                 |                                                                                                                                                                                                                                                                                                                                                                                                                                                                                                                                                                                                                                                                                                                                                                                                                                                                                                                                                                                                                                                                                                                                                                                  |
|---------------------------------|----------------------------------------------------------------------------------------------------------------------------------------------------------------------------------------------------------------------------------------------------------------------------------------------------------------------------------------------------------------------------------------------------------------------------------------------------------------------------------------------------------------------------------------------------------------------------------------------------------------------------------------------------------------------------------------------------------------------------------------------------------------------------------------------------------------------------------------------------------------------------------------------------------------------------------------------------------------------------------------------------------------------------------------------------------------------------------------------------------------------------------------------------------------------------------|
| Journal:                        | <i>BMJ Open</i>                                                                                                                                                                                                                                                                                                                                                                                                                                                                                                                                                                                                                                                                                                                                                                                                                                                                                                                                                                                                                                                                                                                                                                  |
| Manuscript ID                   | bmjopen-2020-043060.R1                                                                                                                                                                                                                                                                                                                                                                                                                                                                                                                                                                                                                                                                                                                                                                                                                                                                                                                                                                                                                                                                                                                                                           |
| Article Type:                   | Protocol                                                                                                                                                                                                                                                                                                                                                                                                                                                                                                                                                                                                                                                                                                                                                                                                                                                                                                                                                                                                                                                                                                                                                                         |
| Date Submitted by the Author:   | 24-Feb-2021                                                                                                                                                                                                                                                                                                                                                                                                                                                                                                                                                                                                                                                                                                                                                                                                                                                                                                                                                                                                                                                                                                                                                                      |
| Complete List of Authors:       | Cleveland, Shiloh; University of California Los Angeles, Psychology<br>Reed, Kristina; University of California Los Angeles, Psychology<br>Thomas, Jordan; University of California Los Angeles, Psychology<br>Ajijola, Olujimi; University of California Los Angeles, Neurocardiology<br>Research Center of Excellence, Cardiac Arrhythmia Center<br>Ebrahimi, Ramin; University of California Los Angeles, Medicine;<br>Veterans Affairs Greater Los Angeles Healthcare System, Medicine,<br>Cardiology Section<br>Hsiai, Tzung; University of California Los Angeles, Medicine; University of<br>California Los Angeles, Bioengineering<br>Lazarov, Amit; Tel Aviv University, School of Psychological Sciences<br>Montoya, Amanda; University of California Los Angeles, Psychology<br>Neria, Yuval; Columbia University Irving Medical Center, Psychiatry;<br>Columbia University Irving Medical Center, Epidemiology<br>Shimbo, Daichi; Columbia University Irving Medical Center, Medicine<br>Wolitzky-Taylor, Kate; University of California Los Angeles, Psychiatry<br>and Biobehavioral Sciences<br>Sumner, Jennifer; University of California Los Angeles, Psychology |
| <b>Primary Subject Heading</b>: | Mental health                                                                                                                                                                                                                                                                                                                                                                                                                                                                                                                                                                                                                                                                                                                                                                                                                                                                                                                                                                                                                                                                                                                                                                    |
| Secondary Subject Heading:      | Cardiovascular medicine                                                                                                                                                                                                                                                                                                                                                                                                                                                                                                                                                                                                                                                                                                                                                                                                                                                                                                                                                                                                                                                                                                                                                          |
| Keywords:                       | Anxiety disorders < PSYCHIATRY, Adult psychiatry < PSYCHIATRY,<br>Cardiology < INTERNAL MEDICINE                                                                                                                                                                                                                                                                                                                                                                                                                                                                                                                                                                                                                                                                                                                                                                                                                                                                                                                                                                                                                                                                                 |
|                                 |                                                                                                                                                                                                                                                                                                                                                                                                                                                                                                                                                                                                                                                                                                                                                                                                                                                                                                                                                                                                                                                                                                                                                                                  |

SCHOLARONE™  
Manuscripts



I, the Submitting Author has the right to grant and does grant on behalf of all authors of the Work (as defined in the below author licence), an exclusive licence and/or a non-exclusive licence for contributions from authors who are: i) UK Crown employees; ii) where BMJ has agreed a CC-BY licence shall apply, and/or iii) in accordance with the terms applicable for US Federal Government officers or employees acting as part of their official duties; on a worldwide, perpetual, irrevocable, royalty-free basis to BMJ Publishing Group Ltd ("BMJ") its licensees and where the relevant Journal is co-owned by BMJ to the co-owners of the Journal, to publish the Work in this journal and any other BMJ products and to exploit all rights, as set out in our [licence](#).

The Submitting Author accepts and understands that any supply made under these terms is made by BMJ to the Submitting Author unless you are acting as an employee on behalf of your employer or a postgraduate student of an affiliated institution which is paying any applicable article publishing charge ("APC") for Open Access articles. Where the Submitting Author wishes to make the Work available on an Open Access basis (and intends to pay the relevant APC), the terms of reuse of such Open Access shall be governed by a Creative Commons licence – details of these licences and which [Creative Commons](#) licence will apply to this Work are set out in our licence referred to above.

Other than as permitted in any relevant BMJ Author's Self Archiving Policies, I confirm this Work has not been accepted for publication elsewhere, is not being considered for publication elsewhere and does not duplicate material already published. I confirm all authors consent to publication of this Work and authorise the granting of this licence.

1  
2  
3  
4  
5  
6  
7 Key Dimensions of Posttraumatic Stress Disorder and Endothelial Dysfunction:

8  
9 A Protocol for a Mechanism-Focused Cohort Study

10  
11  
12  
13 Shiloh Cleveland,<sup>1</sup> Kristina Reed,<sup>1</sup> Jordan L. Thomas,<sup>1</sup> Olujimi A. Ajijola,<sup>2</sup> Ramin Ebrahimi,<sup>3,4</sup>

14  
15 Tzung Hsiai,<sup>4,5</sup> Amit Lazarov,<sup>6</sup> Amanda K. Montoya,<sup>1</sup> Yuval Neria,<sup>7,8</sup> Daichi Shimbo,<sup>9</sup> Kate

16  
17 Wolitzky-Taylor,<sup>10</sup> Jennifer A. Sumner<sup>1\*</sup>

18  
19  
20  
21 <sup>1</sup>Department of Psychology, University of California, Los Angeles, Los Angeles, CA, USA

22  
23 <sup>2</sup>Neurocardiology Research Center of Excellence, Cardiac Arrhythmia Center, University of  
24 California, Los Angeles, Los Angeles, CA, USA

25  
26 <sup>3</sup>Department of Medicine, Cardiology Section, Veterans Affairs Greater Los Angeles Healthcare  
27 System, Los Angeles, CA, USA

28  
29 <sup>4</sup>Department of Medicine, University of California, Los Angeles, Los Angeles, CA, USA

30  
31 <sup>5</sup>Department of Bioengineering, University of California, Los Angeles, Los Angeles, CA, USA

32  
33 <sup>6</sup>School of Psychological Sciences, Tel Aviv University, Tel Aviv, Israel

34  
35 <sup>7</sup>Department of Psychiatry, Columbia University Irving Medical Center, New York, NY, USA

36  
37 <sup>8</sup>Department of Epidemiology, Columbia University Irving Medical Center, New York, NY,  
38 USA

39  
40 <sup>9</sup>Department of Medicine, Columbia University Irving Medical Center, New York, NY, USA

41  
42 <sup>10</sup>Department of Psychiatry and Biobehavioral Sciences, University of California, Los Angeles,  
43 Los Angeles, CA, USA

44  
45 \*Corresponding author: Jennifer A. Sumner, PhD, Department of Psychology, University of  
46 California, Los Angeles, Psychology Building 1285, Box 951563, Los Angeles, CA 90095-1563;  
47 E-mail: [jsumner@psych.ucla.edu](mailto:jsumner@psych.ucla.edu)

48  
49  
50  
51 Word count: 4,000

## ABSTRACT

### Introduction

Both trauma exposure and posttraumatic stress disorder (PTSD) are associated with increased risk of cardiovascular disease (CVD), the leading cause of death in the United States. Endothelial dysfunction, a modifiable, early marker of CVD risk, may represent a physiological mechanism underlying this association. This mechanism-focused cohort study aims to investigate the relationship between PTSD (both in terms of diagnosis and underlying symptom dimensions) and endothelial dysfunction in a diverse, community-based sample of adult men and women.

### Methods and analysis

Using a cohort design, 160 trauma-exposed participants without a history of CVD are designated to the PTSD group ( $n=80$ ) or trauma-exposed matched control group ( $n=80$ ) after a baseline diagnostic interview assessment. Participants in the PTSD group have a current (past-month) diagnosis of PTSD, whereas those in the control group have a history of trauma but no current or past psychiatric diagnoses. Endothelial dysfunction is assessed via flow-mediated vasodilation (FMD) of the brachial artery and circulating levels of endothelial cell-derived microparticles (EMPs). Two higher-order symptom dimensions of PTSD—fear and dysphoria—are measured objectively with a fear conditioning paradigm and attention allocation task, respectively.

Autonomic imbalance, inflammation, and oxidative stress are additionally assessed and will be examined as potential pathway variables linking PTSD and its dimensions with endothelial dysfunction. Participants are invited to return for a 2-year follow-up visit to re-assess PTSD and its dimensions and endothelial dysfunction in order to investigate longitudinal associations.

### Ethics and Dissemination plan

1  
2  
3 This study is conducted in compliance with the Helsinki Declaration and University of  
4 California, Los Angeles Institutional Review Board. The results of this study will be  
5  
6 disseminated via articles in peer-reviewed journals and presentations at academic conferences  
7  
8 and to community partners.  
9

10  
11  
12 **Trial registration number**

13  
14 NCT03778307; Pre-results  
15  
16  
17  
18  
19  
20

21 **Keywords:** Trauma; posttraumatic stress disorder; mental health; endothelial dysfunction;  
22  
23 cardiology  
24  
25  
26  
27  
28  
29  
30  
31  
32  
33  
34  
35  
36  
37  
38  
39  
40  
41  
42  
43  
44  
45  
46  
47  
48  
49  
50  
51  
52  
53  
54  
55  
56  
57  
58  
59  
60

## ARTICLE SUMMARY

### Strengths and limitations of this study

- This is the first study to assess endothelial dysfunction, an early marker of CVD risk, using both functional (FMD) and cellular (EMP) approaches in a sample of trauma-exposed individuals.
- This study is the first to investigate whether PTSD and its dimensions are related to change in endothelial dysfunction over time.
- This study comprehensively examines whether objective measures of underlying dimensions of PTSD—fear and dysphoria—are related to endothelial dysfunction.
- Whereas previous research on PTSD and endothelial dysfunction has been conducted in predominantly male samples of veterans and police officers, we have a diverse, community-based sample of men and women with and without current PTSD who have been exposed to a range of traumas.
- Although the approach of assessing key constructs in the research laboratory permits more controlled measures of these constructs, it limits the generalizability of findings to participants' experiences in real-world settings.



## INTRODUCTION

Despite advances in prevention and intervention, cardiovascular disease (CVD) remains the leading cause of death in the United States.<sup>1</sup> Growing research demonstrates longitudinal links between trauma exposure, posttraumatic stress disorder (PTSD), and CVD, suggesting trauma and PTSD as novel targets for reducing CVD risk. Trauma is common; the vast majority of individuals (50-90%) experience a trauma in their lifetime, including natural disasters, physical assault, and unwanted sexual contact.<sup>2,3</sup> PTSD is the quintessential trauma-related disorder, characterized by symptoms of re-experiencing of the trauma, avoidance of trauma reminders, negative alterations in cognition and mood, and hyperarousal.<sup>4</sup> PTSD has been associated with heightened risk of incident CVD, even after accounting for numerous risk factors.<sup>5-11</sup> Trauma exposure, independent of trauma-related psychopathology, has also been linked to elevated CVD risk.<sup>5, 12-14</sup>

Given this evidence, experts in clinical psychology and cardiology have called for CVD risk surveillance after trauma.<sup>15</sup> To support such efforts, it is critical to identify intermediary mechanisms linking posttraumatic stress and CVD risk that can guide monitoring and intervention approaches. Endothelial dysfunction may be one such mechanism. Endothelial cells, which form the inner lining of blood vessels, are one of the first physiological indicators of reduced capacity to respond to cardiovascular demand, with endothelial dysfunction implicated in the pathophysiology of atherosclerosis and CVD.<sup>16,17</sup> For every 1% decrease in brachial artery flow-mediated vasodilation (FMD; a functional measure of endothelial dysfunction), CVD risk increases by 9-13%.<sup>18-20</sup> Endothelial dysfunction can also be assessed by quantifying circulating levels of endothelial cell-derived microparticles (EMPs), direct measures of endothelial cell injury involved in atherosclerosis risk.<sup>21-24</sup> As endothelial dysfunction can be detected in CVD-

1  
2  
3 free individuals<sup>25</sup> and is a malleable risk marker responsive to intervention,<sup>26 27</sup> it is an optimal  
4  
5 target for prevention and risk mechanism research.  
6  
7

8 Initial studies in select samples (women aged 40-60 years, male veterans or police  
9  
10 officers) suggest that trauma exposure and elevated PTSD symptoms are associated with lower  
11  
12 FMD.<sup>28-30</sup> Additionally, work in trauma-exposed individuals reveals that the greater the PTSD  
13  
14 symptom severity, the lower the FMD, even among individuals without PTSD diagnoses.<sup>28</sup>  
15  
16 PTSD has also been associated with biomarkers of endothelial dysfunction,<sup>31 32</sup> although no  
17  
18 studies have considered specific markers of cellular injury (EMPs).  
19  
20  
21

22 Existing research has also been limited by treating PTSD as a homogeneous diagnosis.  
23  
24 However, PTSD has great heterogeneity in how symptoms manifest.<sup>33</sup> Thus, understanding  
25  
26 which aspects of PTSD particularly affect intermediary mechanisms will inform monitoring  
27  
28 efforts and intervention development. Broadly, PTSD consists of two higher-order dimensions:  
29  
30 fear and dysphoria.<sup>34-36</sup> Fear reflects an alarm response to perceived danger, whereas dysphoria  
31  
32 represents low positive affect and anhedonia.<sup>34</sup> PTSD dimensions hold promise for  
33  
34 distinguishing specific versus nonspecific aspects of the disorder.<sup>34</sup> Whereas dysphoria is  
35  
36 considered an auxiliary component of PTSD, shared with depression, fear is considered a core  
37  
38 component of PTSD.<sup>37</sup> Longitudinal network analyses indicate that fear responses are central  
39  
40 aspects of acute and chronic posttraumatic stress responses, whereas dysphoria symptoms are  
41  
42 secondary responses that develop over time.<sup>35</sup> Furthermore, impaired fear learning and inability  
43  
44 to suppress fear in safe situations are key pathological processes in PTSD.<sup>38</sup> Experimentally, fear  
45  
46 conditioning paradigms provide a translational framework for examining dysregulated fear  
47  
48 responses,<sup>39</sup> which can be measured using objective psychophysiological measures, including  
49  
50 skin conductance (SC) responses and fear-potentiated startle (FPS).<sup>40-42</sup> In fear conditioning  
51  
52  
53  
54  
55  
56  
57  
58  
59  
60

1  
2  
3 research, PTSD has been characterized by psychophysiological responses indicative of  
4 dysregulated fear responding, including difficulties with safety signal processing and fear  
5 inhibition.<sup>43-45</sup> Additionally, some trauma-exposed individuals without PTSD exhibit  
6  
7 psychophysiological responses akin to individuals with PTSD,<sup>46 47</sup> reflecting similar trauma-  
8 related psychophysiological fear that could explain their lower FMD.<sup>28</sup>  
9  
10  
11  
12  
13

14  
15 Furthermore, psychophysiological fear responses are promising targets for understanding  
16 links between PTSD and CVD risk, as they may engage key biological mechanisms. For  
17 example, repeated bouts of psychophysiological reactivity may promote autonomic  
18 dysregulation<sup>48-50</sup> and elevated systemic inflammation and oxidative stress,<sup>51-53</sup> which can have  
19 deleterious effects on cardiovascular health.<sup>54</sup> However, research has yet to comprehensively  
20 examine mechanisms by which psychophysiological fear—or another PTSD dimension—may  
21 relate to endothelial dysfunction.  
22  
23  
24  
25  
26  
27  
28  
29

### 30 31 **Objectives**

32  
33 This study examines links between PTSD and its dimensions with endothelial  
34 dysfunction in trauma-exposed men and women (see Figure 1 for conceptual model). First, we  
35 examine the association of PTSD diagnosis with endothelial dysfunction, assessed via functional  
36 (FMD) and cellular (EMP) measures. We hypothesize that participants with versus without  
37 PTSD will have lower FMD and, secondarily, higher EMP levels. Second, we investigate which  
38 PTSD dimensions are most strongly associated with endothelial dysfunction. We predict that  
39 stronger psychophysiological fear responses (measured by FPS and SC) will be associated with  
40 lower FMD and, secondarily, higher EMP levels. Although we focus on the core dimension of  
41 fear, we investigate the dysphoria-endothelial dysfunction relation to comprehensively assess  
42 potential intervention targets. Third, we explore autonomic imbalance, inflammation, and  
43  
44  
45  
46  
47  
48  
49  
50  
51  
52  
53  
54  
55  
56  
57  
58  
59  
60

oxidative stress as potential mechanisms. Finally, we examine whether PTSD and its dimensions predict change in endothelial dysfunction over 2 years.

## METHODS AND ANALYSIS

### Brief Study Overview

This mechanism-focused cohort study examines primarily cross-sectional and, secondarily longitudinal, associations. Enrollment began in 2019, and the study is projected to continue through 2023. Investigating the PTSD diagnosis-endothelial dysfunction relation utilizes a case-control approach, whereas analyses of PTSD dimensions are conducted in the full sample. The sample will include 160 men and women without CVD from the Los Angeles area (80 individuals with PTSD; 80 trauma-exposed controls). Group designations are determined via diagnostic interview assessment. No-trauma controls were not included, as this study focuses on identifying what aspects of PTSD symptoms are linked to endothelial dysfunction.

### Participants

Eligible participants are  $\geq 18$  years old, fluent English speakers, and trauma-exposed. Participants in the PTSD group have a current PTSD diagnosis based on the past-month Clinician-Administered PTSD Scale for *DSM-5* (CAPS-5),<sup>55</sup> whereas controls are trauma-exposed with no psychiatric diagnoses and a CAPS-5 score  $< 25$ .<sup>56</sup> Exclusions include (a) individual CVD history (physician-diagnosed myocardial infarction, angina, heart failure, peripheral artery disease, stroke, transient ischemic attack, atrial fibrillation, ventricular arrhythmias); (b) current psychotropic medication use (except benzodiazepines taken as-needed), as this has been shown to influence key study variables including FMD, psychophysiological responses, and attentional allocation;<sup>57-61</sup> (c) current bipolar, psychotic, or moderate or severe substance use disorder; (d) mild or severe cognitive impairment (Mini-Mental State Exam

1  
2  
3 (MMSE) score  $\leq 18$ );<sup>62</sup> (e) acute, unstable, or severe medical disorder or pregnancy; or (f)  
4  
5 needing immediate psychiatric intervention (e.g., active suicidality).  
6

## 7 **Recruitment and Enrollment**

8  
9  
10 The study timeline is depicted in Figure 2. Participants are recruited via online  
11  
12 advertisements, University of California, Los Angeles (UCLA) staff listservs, flyers throughout  
13  
14 the community, and word-of-mouth referrals. Interested individuals are phone-screened to assess  
15  
16 initial eligibility. After obtaining verbal consent, research personnel assess inclusion and  
17  
18 exclusion criteria: English fluency, CVD history, psychotropic medication use, lifetime exposure  
19  
20 to 17 types of trauma (using the Life Events Checklist for *DSM-5* (LEC-5)),<sup>63</sup> and past-month  
21  
22 PTSD symptoms with respect to the trauma participants identify as most distressing (using the  
23  
24 PTSD Checklist for *DSM-5* (PCL-5)).<sup>64</sup> The most distressing trauma is categorized as combat,  
25  
26 non-combat interpersonal violence (e.g., assault), or non-interpersonal violence (e.g., accident).<sup>65</sup>  
27  
28 Time since trauma is also recorded. Eligible individuals are scheduled for a diagnostic interview  
29  
30 assessment.  
31  
32  
33  
34

## 35 **Procedures**

### 36 ***Diagnostic Interview Assessment***

37  
38  
39  
40 Highly trained research personnel administer standardized clinical interviews.  
41  
42 Interviewers have at least a Bachelor's degree and complete extensive training including self-  
43  
44 guided study, didactics, diagnosing cases from recordings, and role-playing. After obtaining  
45  
46 written informed consent, the interviewer conducts a brief clinical interview to build rapport and  
47  
48 review information about the participant's history and current functioning.  
49  
50

51  
52 The first diagnostic interview administered is the CAPS-5,<sup>55</sup> a gold standard structured  
53  
54 interview querying past-month experiences of the 20 *DSM-5* PTSD criteria.<sup>66</sup> Symptoms are  
55  
56  
57  
58  
59

1  
2  
3 anchored to an index trauma self-identified by participants as their most distressing event.  
4  
5 Responses for each symptom are scored with respect to frequency and intensity and combined  
6  
7 into a severity score ranging from 0 (Absent) to 4 (Extreme/incapacitating). Symptom  
8  
9 endorsement is used to determine current PTSD diagnosis, and severity scores are summed for a  
10  
11 total severity score. Presence and history of other psychopathology are evaluated using the  
12  
13 Structured Clinical Interview for *DSM-5*, Research Version (SCID-5-RV),<sup>67</sup> the gold standard in  
14  
15 psychopathology assessment. Mood disorder episodes and psychotic symptoms are assessed for  
16  
17 all participants; anxiety, substance abuse, eating, and obsessive-compulsive disorders are  
18  
19 assessed as needed based on screening questions. Interviewers then assess participants' medical  
20  
21 history and health behaviors, including family history of CVD, personal history of medical  
22  
23 conditions, pregnancy, medications, smoking, and physical activity. If cognitive impairment is  
24  
25 suspected, the MMSE is administered.<sup>62</sup>  
26  
27  
28  
29

30  
31 Participants conclude the visit by completing several valid and reliable questionnaires.  
32  
33 After reporting on sociodemographics, participants complete measures of childhood adversity:  
34  
35 the Childhood Trauma Questionnaire<sup>68</sup> (measuring child abuse and neglect); the Childhood  
36  
37 Experiences of Care and Abuse<sup>69</sup> antipathy and neglect items (anchored to participants' primary  
38  
39 caregiver); the Conflict Tactics Scale<sup>70</sup> (measuring family violence); and a food insecurity  
40  
41 measure based on the U.S. Department of Agriculture's Food Security Scale.<sup>71</sup> Participants  
42  
43 report on PTSD symptoms (anchored to the CAPS-5 index trauma) using the PCL-5<sup>64 72</sup> and  
44  
45 depressive symptoms using the Patient Health Questionnaire-8.<sup>73</sup> Participants describe their sleep  
46  
47 with the Pittsburgh Sleep Quality Index (PSQI),<sup>74</sup> PSQI Addendum for PTSD,<sup>75</sup> Insomnia  
48  
49 Severity Index,<sup>76</sup> and RU-SATED.<sup>77</sup>  
50  
51  
52  
53  
54  
55  
56  
57  
58  
59  
60

1  
2  
3 Propensity scores are used in recruitment to improve balance of sociodemographic and  
4 trauma-related characteristics across the PTSD and trauma-exposed control groups.<sup>78</sup> Scores  
5 reflecting propensity of PTSD group membership are calculated using age, gender,  
6 race/ethnicity, trauma type, time since trauma, and two-way interactions among these variables.  
7  
8 Matching during recruitment is based on quintiles of the propensity score distribution, with  
9 scores re-estimated weekly throughout recruitment. Participants are recruited if there are <3  
10 unmatched individuals from their group in the same quintile.  
11  
12  
13  
14  
15  
16  
17  
18

19 Diagnostic interview assessments are reviewed by interviewers and supervised by a  
20 licensed clinical psychologist. Participants are informed of their eligibility via phone, with  
21 eligible participants scheduled for a laboratory visit ~2-3 weeks later.  
22  
23  
24  
25

### 26 ***Baseline Laboratory Visit***

27  
28 Participants are instructed to avoid exercise, food and drink (except water), smoking, and  
29 use of other tobacco, marijuana, or cannabidiol-containing products at least eight hours before  
30 this visit. Medications and vitamins (except diabetes medication, blood thinners, statins, and  
31 birth control) are avoided for at least 48 hours.  
32  
33  
34  
35  
36  
37

38 Participants are asked to arrive at the research laboratory by 8am. They are escorted to a  
39 study room for initial measurements and specimen collection; assessments are conducted by a  
40 research nurse. Height, weight, waist and hip circumferences, and left arm circumference are  
41 measured, and a spot urine sample is collected. An appropriately sized blood pressure cuff is  
42 placed on the left arm. After a 5-minute rest, three seated blood pressure measures are taken 1  
43 minute apart using a validated device (Omron HEM907XL). Blood is then drawn into serum-  
44 separating, citrate, and EDTA tubes. The citrate tube is centrifuged immediately and processed to  
45 measure EMPs. EDTA tubes are centrifuged within one hour of collection at 1500g at 4°C for 10  
46  
47  
48  
49  
50  
51  
52  
53  
54  
55  
56  
57  
58  
59  
60

1  
2  
3 minutes to isolate plasma; aliquots are stored at  $-80^{\circ}\text{C}$  for inflammatory marker assays. Serum  
4  
5 and whole blood are extracted from serum-separating and EDTA tubes for comprehensive  
6  
7 metabolic and lipid panels and HbA1c, respectively.  
8  
9

10 Participants are then escorted to a temperature-controlled room to measure brachial artery  
11  
12 FMD using a high-resolution, semi-automatic ultrasonography system (UNEXEF38G).<sup>79-81</sup>  
13  
14 Testing occurs between 8-10am to account for circadian effects on FMD and is conducted  
15  
16 according to published guidelines.<sup>82 83</sup> Participants lie supine, and a blood pressure cuff is placed  
17  
18 around the right forearm. After a 15-minute rest, a baseline measure of brachial artery diameter  
19  
20 is obtained. The UNEXEF38G system has a high-resolution linear artery transducer, coupled to  
21  
22 computer-assisted analysis software that uses an automated edge detection system for  
23  
24 measurement. The cuff is then inflated to 200mmHg (or 50mmHg above systolic pressure, if  
25  
26  $>150\text{mmHg}$ ) for 5 minutes. Images of the brachial artery are obtained continuously until 2  
27  
28 minutes after cuff deflation.  
29  
30  
31  
32

33 After FMD measurement, participants are provided a snack before completing tasks  
34  
35 assessing posttraumatic fear and dysphoria. Task order is counterbalanced. Prior to completing  
36  
37 the fear conditioning paradigm used to assess posttraumatic fear, participants undergo a heart  
38  
39 rate response to deep breathing (HRDB) protocol; both tasks involve psychophysiological  
40  
41 measurements. HRDB tests autonomic function, specifically parasympathetic tone.<sup>84</sup> Participants  
42  
43 lie supine; respiration is measured with a respiration belt and ECG is measured with electrodes  
44  
45 placed above the left and right collar bones and on the left lower forearm and recorded with the  
46  
47 Biopac MP160 ECG wireless module. ECG and respiration data are collected during a 1-minute  
48  
49 resting baseline and 10-second respiratory cycle (5-second inhale, 5-second exhale), repeated  
50  
51  
52  
53  
54 6 times.<sup>84</sup>  
55  
56  
57  
58  
59  
60



1  
2  
3 Posttraumatic fear is assessed using an established fear conditioning protocol with two  
4 phases: Fear Acquisition and Extinction.<sup>43 85</sup> During Fear Acquisition, participants complete a 4-  
5 trial habituation phase in which two colored shape conditioned stimuli (CS) and a 108dB, 40-  
6 millisecond broadband noise startle probe alone (NA) are presented to familiarize participants.  
7  
8 Next, participants undergo a 36-trial conditioning phase, with 3 blocks of 12 trials: 4 reinforced  
9 CS (CS+), 4 nonreinforced CS (CS-), and 4 NA trials. CS are presented on a computer monitor  
10 for 6 seconds; the startle probe is delivered binaurally via headphones on every trial after 6  
11 seconds. During conditioning, only the CS+ is reinforced with an unconditioned stimulus (US)  
12 on every trial. The US is a 250-millisecond airblast of 140psi intensity directed at the larynx,  
13 which has consistently produced robust FPS.<sup>43 85</sup> On the CS+ trials, the US co-terminates with  
14 the CS+ 0.5 seconds following the startle probe; CS- trials terminate immediately after the startle  
15 probe. After a 10-minute break, participants undergo the 72-trial Fear Extinction phase: 6 blocks  
16 of 4 trials of each type (CS+, CS-, NA). During Extinction, the CS+ is presented without the US.  
17 Inter-trial intervals are randomized to be 9-22 seconds for Fear Acquisition and Extinction.  
18  
19

20  
21  
22  
23  
24  
25  
26  
27  
28  
29  
30  
31  
32  
33  
34  
35  
36  
37  
38  
39  
40  
41  
42  
43  
44  
45  
46  
47  
48  
49  
50  
51  
52  
53  
54  
55  
56  
57  
58  
59  
60  
Psychophysiological fear responses are collected using Biopac MP160 electromyography  
(EMG) and SC wireless modules; ECG is also recorded. FPS is measured through corrugator and  
orbicularis EMG. Startle magnitude is assessed as the peak amplitude of EMG contraction 20-  
200ms following the startle probe. SC data are collected using electrodes on the hypothenar  
surface of the non-dominant hand to measure sympathetic arousal. Psychophysiological data are  
filtered, rectified, and smoothed using MindWare software. Several indicators of  
psychophysiological fear responses are calculated, including: 1) FPS to CS+ during early  
extinction (fear load<sup>85</sup>), 2) FPS to CS+ during late extinction, and 3) FPS to CS- during late fear  
acquisition. These measures reflect expression of conditioned fear, fear inhibition, and fear

1  
2  
3 discrimination.<sup>85-87</sup> FPS is calculated by subtracting startle magnitude to the NA from startle  
4 magnitude to the CS in each block to account for individual differences in startle magnitude and  
5 habituation. Comparable scores for SC response are secondary predictors. Although frequently  
6 used to index fear, SC response may be a more nonspecific measure of arousal that is not as  
7 closely tied to fear neurocircuitry as FPS.<sup>87-89</sup> SC response is calculated by subtracting SC prior  
8 to stimulus onset from maximum SC during CS presentation.

9  
10  
11  
12  
13  
14  
15  
16  
17 Posttraumatic dysphoria is assessed with an established and reliable eye-tracking  
18 paradigm adapted for dysphoria.<sup>90</sup> Attention allocation is measured using a remote high-speed  
19 eye-tracker (EyeLink Portable Duo). The task consists of free-viewing 4x4 matrices of  
20 NimStim<sup>91</sup> happy and sad faces. Trials begin with a fixation cross, shown until a 1000-  
21 millisecond fixation is recorded, to verify trials begin with gaze fixated at the matrix's center.  
22 Matrices are presented for 6000 milliseconds, followed by a 2000-millisecond inter-trial interval.  
23 Participants view 60 different matrices, presented in 2 blocks of 30 each, with a 60-second break  
24 between blocks. Eye-tracking data are used to define fixations as 100 milliseconds+ of stable  
25 fixation within 1-degree visual angle. Dwell time for two Areas of Interest (AOIs)—the eight sad  
26 faces and eight happy faces—are calculated for each matrix. Dwell time for each AOI is  
27 averaged across the 60 matrices.

### 41 *Follow-up Visit*

42  
43  
44  
45 Approximately two years after the baseline visit, all participants are invited to return for a  
46 follow-up; we aim to re-evaluate at least 80 individuals (40+ in each group). At follow-up,  
47 participants repeat all procedures from the baseline laboratory visit.

### 51 **Outcome Measures**

#### 52 *Main Outcomes*

1  
2  
3 **FMD.** Our primary outcome is brachial artery FMD. As described above, pulsed Doppler  
4 velocity signals are obtained at baseline and after cuff deflation using the UNEXEF38G  
5 ultrasonography system. FMD is the percent difference in brachial artery diameter, before and  
6 after occlusion.  
7  
8  
9  
10

11 **EMPs.** Circulating EMPs expressing CD62E and CD31 (endothelial cell activation and  
12 apoptosis, respectively)<sup>24</sup> assessed using flow cytometry are secondary outcome measures. EMP  
13 sample preparation is completed within two hours of blood draw, as previously described.<sup>92-95</sup>  
14 Citrated blood is centrifuged at 160g at 4°C for 10 minutes to obtain platelet-rich plasma, which  
15 is further centrifuged at 1500g at 4°C for 6 minutes to yield platelet-poor plasma. Fifty  
16 microliters of platelet-poor plasma are each incubated in two sets: 1) 4µL of brilliant violet 421  
17 (BV421)-conjugated monoclonal antibody to CD62E (BD), 4µL of phycoerythrin (PE)-  
18 conjugated monoclonal antibody to CD31 (BD), 4µL of fluorescein isothiocyanate (FITC)-  
19 conjugated monoclonal antibody to CD42b (BD), and 2) 4µL of PE-conjugated monoclonal  
20 antibody to CD31, 4µL of FITC-conjugated Annexin V (BD). EMPs are the number of particles  
21 with size <1.5µm 1) positively labeled by CD62E, 2) positively labeled by CD31 and negatively  
22 labeled by CD42b, and 3) positively labeled by CD31 and Annexin V. Allophycocyanin (APC)-  
23 conjugated monoclonal antibody CD45 (a pan-leukocyte marker; BD) is used to exclude  
24 contamination by leukocyte microparticles.<sup>93</sup> Negative controls include the appropriate FITC-  
25 labeled, PE-labeled, BV421-labeled, and APC-labeled isotype-matched IgG. EMPs are  
26 quantified as the number of EMPs per µL (ThermoFisher Attune NxT Flow Cytometer).  
27  
28  
29  
30  
31  
32  
33  
34  
35  
36  
37  
38  
39  
40  
41  
42  
43  
44  
45  
46  
47  
48

### 49 **Potential Pathway Variables**

50  
51 We are exploring autonomic imbalance, inflammation, and oxidative stress as potential  
52 mechanisms linking PTSD and its dimensions with endothelial dysfunction. Average respiratory  
53  
54  
55  
56  
57  
58  
59

1  
2  
3 sinus arrhythmia (RSA) amplitude across the cycles of the HRDB task—defined as the  
4 difference between the end of expiration and end of inspiration in heart rate—reflects  
5  
6 parasympathetic-mediated cardiac control.<sup>84 96</sup> Blood-based inflammatory markers are assayed  
7  
8 from plasma, including high-sensitivity C-reactive protein measured by ELISA (R&D Systems).  
9  
10 Interleukin (IL)-6, IL-8, IL-10, tumor necrosis factor- $\alpha$ , and interferon-gamma are measured in a  
11  
12 multiplex assay utilizing a V-PLEX Custom Human Cytokine Proinflammatory Panel on the  
13  
14 Meso Scale Discovery electrochemiluminescence platform. Oxidative stress is assessed by  
15  
16 measuring urinary F2-isoprostanes using an ELISA (Oxford Biomedical Research).  
17  
18  
19  
20  
21

## 22 **Statistical Analyses**

23  
24 We will first conduct cross-sectional associations of PTSD and its dimensions with  
25  
26 endothelial dysfunction; longitudinal associations will be considered in exploratory analyses.  
27  
28 For cross-sectional analyses, two sample t-tests will compare participants with and without  
29  
30 PTSD on 1) FMD and 2) EMPs expressing CD62E and CD31. We will extend these analyses  
31  
32 using linear regression models adjusting for covariates (described below). We will consider total  
33  
34 PTSD severity score as a continuous predictor. Second, objective measures of posttraumatic fear  
35  
36 (e.g., fear load based on FPS) will be the exposures in cross-sectional linear regression analyses  
37  
38 of FMD and EMP outcomes. Additionally, we will explore objective measures of posttraumatic  
39  
40 dysphoria as predictors of endothelial dysfunction. The approach for these analyses will mirror  
41  
42 that for posttraumatic fear, with exposures operationalized as total dwell times for the sad and  
43  
44 happy AOIs.  
45  
46  
47  
48

49 For longitudinal analyses, we will first examine how measures of PTSD and its  
50  
51 dimensions at baseline predict change in FMD using linear regression, and then examine how  
52  
53 changes in PTSD and its dimensions over follow-up predict change in FMD using linear  
54  
55  
56  
57  
58  
59  
60

1  
2  
3 regression. Analyses will consider EMPs as secondary outcomes. For longitudinal analyses,  
4  
5 FMD at follow-up will be the outcome; FMD at baseline will be a covariate.  
6

7  
8 To examine if autonomic imbalance, inflammation, and oxidative stress explain  
9  
10 associations of PTSD and its dimensions with endothelial dysfunction in cross-sectional and/or  
11  
12 longitudinal analyses, we will estimate total and direct effects of measures of PTSD and its  
13  
14 dimensions on endothelial dysfunction and test for significant indirect effects using  
15  
16 bootstrapping methods.<sup>97</sup>  
17

18  
19 For all analyses, we will examine a series of adjusted models. The base adjusted model  
20  
21 will include age, gender, race, and ethnicity; subsequent models will sequentially adjust for: 1)  
22  
23 other sociodemographics (e.g., education, marital status); 2) CVD medical risk factors (e.g.,  
24  
25 diabetes, hypertension); 3) medications (e.g., medication for hypertension, hyperlipidemia); and  
26  
27 4) anthropometrics and health behaviors (e.g., body mass index, smoking). Even though  
28  
29 posttraumatic fear has been found to be distinct from the core symptoms of depression,<sup>98 99</sup> we  
30  
31 will also consider depression as a potential confounder given high comorbidity of PTSD and  
32  
33 depression.<sup>2</sup> Data on depression diagnoses and symptoms will be examined as covariates, and we  
34  
35 will explore how comorbidity of PTSD and other psychopathology (e.g., depression) relates to  
36  
37 endothelial dysfunction. To avoid overfitting in adjusted models, we will fit group lasso  
38  
39 regression, which performs variable selection and regularization of regression coefficients, to  
40  
41 identify important predictors of endothelial dysfunction and improve model interpretability.<sup>100</sup>  
42  
43  
44  
45

#### 46 47 **Sample Size Estimation and Power** 48

49 Analyses are powered to our primary outcome, FMD, and based on the smallest effect  
50  
51 size from prior research to be conservative in our calculations. We estimated our effect size  
52  
53 based on Cohen's  $d=0.48$  for the difference in percent change in FMD in patients with versus  
54  
55  
56  
57  
58  
59

1  
2  
3 without PTSD.<sup>28</sup> Power analysis for a two sample *t*-test was conducted to determine a sufficient  
4 sample size using alpha=.05, power=.80, a medium effect size (Cohen's *d*=0.48), two tails, and  
5  
6 equal allocations of participants to the PTSD and trauma control groups. Based on these  
7  
8 assumptions, the desired sample size was 70 participants per group. We conservatively selected  
9  
10 80 participants per group.  
11  
12  
13

14  
15 Given our hypothesis that psychophysiological fear is the key PTSD dimension that will  
16 relate to endothelial dysfunction, we considered power for this analysis based on our primary  
17 exposure for this aim: FPS. We assumed a standard deviation (SD) of 70 for FPS scores<sup>85</sup> and a  
18 SD of 3.5% for FMD.<sup>28</sup> With *N*=160 and a two-sided significance level of .05, we have 80%  
19 power to detect a change of 0.011% in FMD for each unit of FPS score increase.<sup>101</sup> This is a  
20 small effect size,<sup>28</sup> so our sample is large enough to model psychophysiological fear and FMD in  
21 adjusted models.  
22  
23  
24  
25  
26  
27  
28  
29

### 30 31 **Ethics and dissemination**

32  
33 This study is conducted in compliance with the UCLA Institutional Review Board and  
34 Helsinki Declaration. Participants sign informed consent and Health Insurance Portability and  
35 Accountability Act Authorization for Research forms at enrollment. Research personnel review  
36 the study in detail and answer questions. Individuals are informed that participation is optional  
37 and that they may withdraw at any time. After individuals are fully informed about study  
38 procedures, participants who elect to proceed with the study sign the consent document, as do  
39 research personnel. The findings of this study will be disseminated online (ClinicalTrials.gov,  
40 Open Science Framework), presented at conferences, and published in peer-reviewed journals.  
41  
42  
43  
44  
45  
46  
47  
48  
49  
50

### 51 **Patient and public involvement**

1  
2  
3 Patients and the public were not involved in the design or conduct of the study. We plan  
4 to share findings with the public through dissemination to community partners.  
5  
6

## 7 8 **DISCUSSION** 9

10 This is the first study to comprehensively investigate the ways in which PTSD and  
11 dimensions of posttraumatic stress relate to endothelial dysfunction, one of the earliest  
12 modifiable precursors to CVD. To distill pathways by which posttraumatic stress may lead to  
13 CVD risk, we focus on psychophysiological fear—a key dimension of PTSD—although we  
14 consider objective measures of dysphoria, a more nonspecific dimension. This study incorporates  
15 state-of-the-art measures of endothelial dysfunction by investigating brachial artery FMD and  
16 EMPs. No investigation of trauma-exposed individuals has considered functional and cellular  
17 measures of endothelial dysfunction as we do here. Furthermore, unlike prior research with  
18 predominantly white, male samples,<sup>27 28</sup> this study will include men and women of diverse  
19 racial/ethnic backgrounds who have been exposed to a range of traumas, increasing  
20 generalizability of findings.  
21  
22  
23  
24  
25  
26  
27  
28  
29  
30  
31  
32  
33  
34

35 Despite these strengths, there are limitations. Assessments are conducted in the  
36 laboratory, which offers a controlled environment that enhances internal validity but limits  
37 generalizability to real-world settings. Additionally, although we use state-of-the-art measures of  
38 endothelial dysfunction, neither metric indicates endothelial function reactivity to trauma-related  
39 cues. Further research using provocation measures or assessing cardiovascular reactivity in  
40 naturalistic settings is needed to address this issue.  
41  
42  
43  
44  
45  
46  
47  
48

49 PTSD predicts incident CVD, but the field needs intervention targets and intermediary  
50 mechanisms to determine if PTSD interventions can offset CVD risk. This study will test  
51 whether endothelial dysfunction could be an early subclinical, modifiable mechanism by which  
52  
53  
54  
55  
56  
57  
58  
59  
60

1  
2  
3 PTSD increases CVD risk, and whether posttraumatic fear or another dimension could be the  
4  
5 target to offset that risk in vulnerable, trauma-exposed individuals in future intervention studies.  
6  
7  
8  
9  
10  
11  
12  
13  
14  
15  
16  
17  
18  
19  
20  
21  
22  
23  
24  
25  
26  
27  
28  
29  
30  
31  
32  
33  
34  
35  
36  
37  
38  
39  
40  
41  
42  
43  
44  
45  
46  
47  
48  
49  
50  
51  
52  
53  
54  
55  
56  
57  
58  
59  
60

For peer review only



## AUTHOR CONTRIBUTIONS

### **Contributors:**

JAS, DS, YN, AL, OAA, RE, TH, and KW-T contributed significantly to the planning, conception, design, and successful funding of this study. SC, KR, JT, JAS, and KW-T are contributing significantly to the acquisition of data. SC, KR, and JAS drafted the initial version of this manuscript. AKM, DS, YN, AL, OAA, RE, TH, and JAS will be involved in the analyses and interpretation of the data. All authors revised the draft critically for important intellectual content and gave final approval for this version of the manuscript to be submitted for publication.

### **Author Details:**

Shiloh Cleveland and Kristina Reed contributed equally to this work.

## FUNDING STATEMENT

This study is supported by National Heart, Lung, and Blood Institute (NHLBI) grant number R01HL139614.

### **Disclaimer:**

The content is solely the responsibility of the authors and does not necessarily represent the official views of the National Institutes of Health.

For peer review only

### COMPETING INTERESTS

There are no competing interests declared for this study.

For peer review only

## REFERENCES

1. Virani SS, Alonso A, Benjamin EJ, et al. Heart disease and stroke statistics-2020 update: a report from the American Heart Association. *Circulation* 2020;141:e139-e596. doi:10.1161/CIR.0000000000000757 [published Online First: 2020/01/29].
2. Kessler RC, Sonnega A, Bromet E, et al. Posttraumatic stress disorder in the National Comorbidity Survey. *Arch Gen Psychiatry* 1995;52:1048-60. doi:10.1001/archpsyc.1995.03950240066012
3. Kilpatrick DG, Resnick HS, Milanak ME, et al. National estimates of exposure to traumatic events and PTSD prevalence using DSM-IV and DSM-5 criteria. *J Trauma Stress* 2013;26:537-47. doi:10.1002/jts.21848
4. American Psychiatric Association. Diagnostic and statistical manual of mental disorders, fifth edition (DSM-5). Washington, DC: American Psychiatric Association 2013.
5. Sumner JA, Kubzansky LD, Elkind MS, et al. Trauma exposure and posttraumatic stress disorder symptoms predict onset of cardiovascular events in women. *Circulation* 2015;132:251-9. doi:10.1161/circulationaha.114.014492 [published Online First: 2015/06/29].
6. Kubzansky LD, Koenen KC, Jones C, et al. A prospective study of posttraumatic stress disorder symptoms and coronary heart disease in women. *Health Psychol* 2009;28(1):125-30. doi:10.1037/0278-6133.28.1.125
7. Kubzansky LD, Koenen KC, Spiro A, 3rd, et al. Prospective study of posttraumatic stress disorder symptoms and coronary heart disease in the Normative Aging Study. *Arch Gen Psychiatry* 2007;64(1):109-16. doi:10.1001/archpsyc.64.1.109

- 1  
2  
3 8. Vaccarino V, Goldberg J, Rooks C, et al. Post-traumatic stress disorder and incidence of  
4 coronary heart disease: a twin study. *J Am Coll Cardiol* 2013;62(11):970-8.  
5  
6 doi:10.1016/j.jacc.2013.04.085 [published Online First: 2013/07/03].  
7  
8  
9
- 10 9. Boscarino JA. A prospective study of PTSD and early-age heart disease mortality among  
11 Vietnam veterans: implications for surveillance and prevention. *Psychosom Med*  
12 2008;70(6):668-76. doi:10.1097/PSY.0b013e31817bccaf [published Online First:  
13 2008/07/04].  
14  
15  
16  
17  
18
- 19 10. Gradus JL, Farkas DK, Svensson E, et al. Associations between stress disorders and  
20 cardiovascular disease events in the Danish population. *BMJ Open* 2015;5(12):e009334.  
21  
22 doi:10.1136/bmjopen-2015-009334  
23  
24  
25
- 26 11. Edmondson D, Kronish IM, Shaffer JA, et al. Posttraumatic stress disorder and risk for  
27 coronary heart disease: a meta-analytic review. *Am Heart J* 2013;166(5):806-14.  
28  
29 doi:10.1016/j.ahj.2013.07.031 [published Online First: 2013/9/24].  
30  
31  
32
- 33 12. Scott KM, Koenen KC, Aguilar-Gaxiola S, et al. Associations between lifetime traumatic  
34 events and subsequent chronic physical conditions: a cross-national, cross-sectional  
35 study. *PLoS One* 2013;8(11):e80573. doi:10.1371/journal.pone.0080573  
36  
37  
38  
39
- 40 13. Atwoli L, Platt JM, Basu A, et al. Associations between lifetime potentially traumatic events  
41 and chronic physical conditions in the South African Stress and Health Survey: a cross-  
42 sectional study. *BMC Psychiatry* 2016;16:214. doi:10.1186/s12888-016-0929-z  
43  
44  
45  
46
- 47 14. Pietrzak RH, Goldstein RB, Southwick SM, et al. Physical health conditions associated with  
48 posttraumatic stress disorder in U.S. older adults: results from wave 2 of the National  
49 Epidemiologic Survey on Alcohol and Related Conditions. *J Am Geriatr Soc*  
50  
51  
52  
53  
54  
55  
56  
57  
58  
59  
60

- 2012;60(2):296-303. doi:10.1111/j.1532-5415.2011.03788.x [published Online First: 2012/01/27].
15. Burg MM, Soufer R. Post-traumatic stress disorder and cardiovascular disease. *Curr Cardiol Rep* 2016;18(10):94. doi:10.1007/s11886-016-0770-5
16. Flammer AJ, Anderson T, Celermajer DS, et al. The assessment of endothelial function: from research into clinical practice. *Circulation* 2012;126(6):753-67. doi:10.1161/circulationaha.112.093245
17. Shimbo D, Grahame-Clarke C, Miyake Y, et al. The association between endothelial dysfunction and cardiovascular outcomes in a population-based multi-ethnic cohort. *Atherosclerosis* 2007;192(1):197-203. doi:10.1016/j.atherosclerosis.2006.05.005 [published Online First: 2006/06/08].
18. Ras RT, Streppel MT, Draijer R, et al. Flow-mediated dilation and cardiovascular risk prediction: a systematic review with meta-analysis. *Int J Cardiol* 2013;168(1):344-51. doi:10.1016/j.ijcard.2012.09.047 [published Online First: 2012/10/04].
19. Matsuzawa Y, Kwon TG, Lennon RJ, et al. Prognostic value of flow-mediated vasodilation in brachial artery and fingertip artery for cardiovascular events: a systematic review and meta-analysis. *J Am Heart Assoc* 2015;4(11):e002270. doi:10.1161/jaha.115.002270
20. Inaba Y, Chen JA, Bergmann SR. Prediction of future cardiovascular outcomes by flow-mediated vasodilatation of brachial artery: a meta-analysis. *Int J Cardiovasc Imaging* 2010;26(6):631-40. doi:10.1007/s10554-010-9616-1 [published Online First: 2010/03/26].
21. Deanfield JE, Halcox JP, Rabelink TJ. Endothelial function and dysfunction: testing and clinical relevance. *Circulation* 2007;115(10):1285-95. doi:10.1161/circulationaha.106.652859

- 1  
2  
3 22. Mallat Z, Benamer H, Hugel B, et al. Elevated levels of shed membrane microparticles with  
4  
5 procoagulant potential in the peripheral circulating blood of patients with acute coronary  
6  
7 syndromes. *Circulation* 2000;101(8):841-3. doi:10.1161/01.cir.101.8.841  
8  
9
- 10 23. Lynch SF, Ludlam CA. Plasma microparticles and vascular disorders. *Br J Haematol*  
11  
12 2007;137(1):36-48. doi:10.1111/j.1365-2141.2007.06514.x  
13  
14
- 15 24. Jimenez JJ, Jy W, Mauro LM, et al. Endothelial cells release phenotypically and  
16  
17 quantitatively distinct microparticles in activation and apoptosis. *Thromb Res*  
18  
19 2003;109(4):175-80. doi:10.1016/s0049-3848(03)00064-1  
20  
21
- 22 25. Celermajer D, Sorensen K, Georgakopoulos D, et al. Cigarette smoking is associated with  
23  
24 dose-related and potentially reversible impairment of endothelium-dependent dilation in  
25  
26 healthy young adults. *Circulation*. 1993;88(5 Pt 1):2149-55. doi:10.1161/01.cir.88.5.2149  
27  
28
- 29 26. Modena MG, Bonetti L, Coppi F, et al. Prognostic role of reversible endothelial dysfunction  
30  
31 in hypertensive postmenopausal women. *J Am Coll Cardiol* 2002;40(3):505-10.  
32  
33 doi:10.1016/s0735-1097(02)01976-9  
34
- 35 27. Kitta Y, Obata JE, Nakamura T, et al. Persistent impairment of endothelial vasomotor  
36  
37 function has a negative impact on outcome in patients with coronary artery disease. *J Am*  
38  
39 *Coll Cardiol* 2009;53(4):323-30. doi:10.1016/j.jacc.2008.08.074  
40  
41
- 42 28. Grenon SM, Owens CD, Alley H, et al. Posttraumatic stress disorder is associated with worse  
43  
44 endothelial function among veterans. *J Am Heart Assoc* 2016;5(3):e003010.  
45  
46 doi:10.1161/jaha.115.003010  
47  
48
- 49 29. Violanti JM, Andrew ME, Burchfiel CM, et al. Posttraumatic stress symptoms and  
50  
51 subclinical cardiovascular disease in police officers. *Int J Stress Manag* 2006;13(4):541-  
52  
53 54. doi:10.1037/1072-5245.13.4.541  
54  
55  
56  
57  
58  
59  
60

- 1  
2  
3 30. Thurston RC, Barinas-Mitchell E, von Känel R, et al. Trauma exposure and endothelial  
4 function among midlife women. *Menopause* 2018;25(4):368-74.  
5  
6 doi:10.1097/gme.0000000000001036  
7  
8  
9  
10 31. Plantinga L, Bremner JD, Miller AH, et al. Association between posttraumatic stress disorder  
11 and inflammation: a twin study. *Brain Behav Immun* 2013;30:125-32.  
12  
13 doi:10.1016/j.bbi.2013.01.081 [published Online First: 2013/02/04].  
14  
15  
16  
17 32. von Känel R, Hepp U, Traber R, et al. Measures of endothelial dysfunction in plasma of  
18 patients with posttraumatic stress disorder. *Psychiatry Res* 2008;158(3):363-73.  
19  
20 doi:10.1016/j.psychres.2006.12.003  
21  
22  
23  
24 33. Galatzer-Levy IR, Bryant RA. 636,120 ways to have posttraumatic stress disorder. *Perspect*  
25 *Psychol Sci* 2013;8(6):651-62. doi:10.1177/1745691613504115  
26  
27  
28  
29 34. Zoellner LA, Pruitt LD, Farach FJ, et al. Understanding heterogeneity in PTSD: fear,  
30 dysphoria, and distress. *Depress Anxiety* 2014;31(2):97-106. doi:10.1002/da.22133  
31  
32 [published Online First: 2013/06/12].  
33  
34  
35 35. Bryant RA, Creamer M, O'Donnell M, et al. Acute and chronic posttraumatic stress  
36 symptoms in the emergence of posttraumatic stress disorder: a network analysis. *JAMA*  
37 *Psychiatry* 2017;74(2):135-42. doi:10.1001/jamapsychiatry.2016.3470  
38  
39  
40  
41  
42 36. Forbes D, Parslow R, Creamer M, et al. A longitudinal analysis of posttraumatic stress  
43 disorder symptoms and their relationship with fear and anxious-misery disorders:  
44 implications for DSM-V. *J Affect Disord* 2010;127(1-3):147-52.  
45  
46 doi:10.1016/j.jad.2010.05.005 [published Online First: 2010/06/03].  
47  
48  
49  
50  
51 37. Gros DF, Simms LJ, Acierno R. Specificity of posttraumatic stress disorder symptoms: an  
52 investigation of comorbidity between posttraumatic stress disorder symptoms and  
53  
54  
55  
56  
57  
58  
59  
60



- 1  
2  
3 depression in treatment-seeking veterans. *J Nerv Ment Dis* 2010;198(12): 885-90.  
4  
5 doi:10.1097/NMD.0b013e3181fe7410  
6  
7
- 8 38. Foa EB, Kozak MJ. Emotional processing of fear: exposure to corrective information.  
9  
10 *Psychol Bull* 1986;99(1):20-35.  
11
- 12 39. Duits P, Cath DC, Lissek S, et al. Updated meta-analysis of classical fear conditioning in the  
13  
14 anxiety disorders. *Depress Anxiety* 2015;32(4):239-53. doi:10.1002/da.22353 [published  
15  
16 Online First: 2015/02/20].  
17  
18
- 19 40. Jovanovic T, Kazama A, Bachevalier J, et al. Impaired safety signal learning may be a  
20  
21 biomarker of PTSD. *Neuropharmacology* 2012;62(2):695-704.  
22  
23 doi:10.1016/j.neuropharm.2011.02.023 [published Online First: 2011/03/04].  
24  
25
- 26 41. Jovanovic T, Norrholm SD. Neural mechanisms of impaired fear inhibition in posttraumatic  
27  
28 stress disorder. *Front Behav Neurosci* 2011;5:44. doi:10.3389/fnbeh.2011.00044  
29  
30
- 31 42. Jovanovic T, Norrholm SD, Blanding NQ, et al. Impaired fear inhibition is a biomarker of  
32  
33 PTSD but not depression. *Depress Anxiety* 2010;27(3):244-51. doi:10.1002/da.20663  
34  
35
- 36 43. Norrholm SD, Jovanovic T, Olin IW, et al. Fear extinction in traumatized civilians with  
37  
38 posttraumatic stress disorder: relation to symptom severity. *Biol Psychiatry*  
39  
40 2011;69(6):556-63. doi:10.1016/j.biopsych.2010.09.013 [published Online First:  
41  
42 2010/10/29].  
43  
44
- 45 44. Peri T, Ben-Shakhar G, Orr SP, et al. Psychophysiologic assessment of aversive conditioning  
46  
47 in posttraumatic stress disorder. *Biol Psychiatry* 2000;47(6):512-9. doi:10.1016/s0006-  
48  
49 3223(99)00144-4  
50
- 51 45. Blechert J, Michael T, Vriends N, et al. Fear conditioning in posttraumatic stress disorder:  
52  
53 evidence for delayed extinction of autonomic, experiential, and behavioural responses.  
54  
55  
56  
57  
58  
59  
60

- 1  
2  
3 *Behav Res Ther* 2007;45(9):2019-33. doi:10.1016/j.brat.2007.02.012 [published Online  
4  
5 First: 2007/03/12].  
6  
7
- 8 46. Roy MJ, Costanzo M, Leaman S. Psychophysiological identification of subthreshold PTSD in  
9  
10 combat veterans. *Stud Health Technol Inform* 2012;181:149-55.  
11  
12
- 13 47. Costanzo M, Jovanovic T, Norrholm SD, et al. Psychophysiological investigation of combat  
14  
15 veterans with subthreshold post-traumatic stress disorder symptoms. *Mil Med*  
16  
17 2016;181(8):793-802. doi:10.7205/milmed-d-14-00671  
18  
19
- 20 48. Thayer JF, Yamamoto SS, Brosschot JF. The relationship of autonomic imbalance, heart rate  
21  
22 variability and cardiovascular disease risk factors. *Int J Cardiol* 2010;141(2):122-31.  
23  
24 doi:10.1016/j.ijcard.2009.09.543 [published Online First: 2009/11/11].  
25  
26
- 27 49. Ruiz-Padial E, Sollers JJ 3rd, Vila J, et al. The rhythm of the heart in the blink of an eye:  
28  
29 emotion-modulated startle magnitude covaries with heart rate variability.  
30  
31 *Psychophysiology* 2003;40(2):306-13. doi:10.1111/1469-8986.00032  
32  
33
- 34 50. Melzig CA, Weike AI, Hamm AO, et al. Individual differences in fear-potentiated startle as a  
35  
36 function of resting heart rate variability: implications for panic disorder. *Int J*  
37  
38 *Psychophysiol* 2009;71(2):109-17. doi:10.1016/j.ijpsycho.2008.07.013 [published Online  
39  
40 First: 2008/07/28].  
41  
42
- 43 51. O'Donovan A, Ahmadian AJ, Neylan TC, et al. Current posttraumatic stress disorder and  
44  
45 exaggerated threat sensitivity associated with elevated inflammation in the Mind Your  
46  
47 Heart Study. *Brain Behav Immun* 2017;60:198-205. doi:10.1016/j.bbi.2016.10.014  
48  
49 [published Online First: 2016/10/17].  
50  
51
- 52 52. Michopoulos V, Rothbaum AO, Jovanovic T, et al. Association of CRP genetic variation and  
53  
54 CRP level with elevated PTSD symptoms and physiological responses in a civilian  
55  
56  
57  
58  
59  
60

- 1  
2  
3 population with high levels of trauma. *Am J Psychiatry* 2015;172(4):353-62.  
4  
5 doi:10.1176/appi.ajp.2014.14020263 [published Online First: 2014/12/12].  
6  
7
- 8 53. Miller MW, Sadeh N. Traumatic stress, oxidative stress and post-traumatic stress disorder:  
9  
10 neurodegeneration and the accelerated-aging hypothesis. *Mol Psychiatry*  
11  
12 2014;19(11):1156-62. doi:10.1038/mp.2014.111 [published Online First: 2014/09/23].  
13  
14
- 15 54. Wentworth BA, Stein MB, Redwine LS, et al. Post-traumatic stress disorder: a fast track to  
16  
17 premature cardiovascular disease? *Cardiol Rev* 2013;21(1):16-22.  
18  
19 doi:10.1097/CRD.0b013e318265343b  
20  
21
- 22 55. Weathers FW, Blake DD, Schnurr P, et al. The Clinician-Administered PTSD Scale for  
23  
24 DSM-5 (CAPS-5). National Center for PTSD. 2013. <http://www.ptsd.va.gov>.  
25
- 26 56. Schnurr PP, Chard KM, Ruzek JI, et al. Design of VA Cooperative Study #591: CERV-  
27  
28 PTSD, comparative effectiveness research in veterans with PTSD. *Contemp Clin Trials*  
29  
30 2015;41:75-84. doi:10.1016/j.cct.2014.11.017 [published Online First: 2014/11/29].  
31  
32
- 33 57. Hantsoo L, Czarkowski KA, Child J, et al. Selective serotonin reuptake inhibitors and  
34  
35 endothelial function in women. *J Womens Health* 2014;23(7):613-18.  
36  
37 doi:10.1089/jwh.2013.4623 [published Online First: 2014/6/2].  
38  
39
- 40 58. Grillon C, Chavis C, Covington MF, et al. Two-week treatment with the selective serotonin  
41  
42 reuptake inhibitor citalopram reduces contextual anxiety but not cued fear in healthy  
43  
44 volunteers: a fear-potentiated startle study. *Neuropsychopharmacology* 2009;34(4):964-  
45  
46 71. doi:10.1038/npp.2008.141 [published Online First: 2008/9/17].  
47  
48
- 49 59. Ikawa M, Tabuse H, Ueno S, et al. Effects of combination psychotropic drug treatment on  
50  
51 heart rate variability in psychiatric patients. *Psychiatry Clin Neurosci* 2001;55(4):341-45.  
52  
53 doi:<https://doi.org/10.1046/j.1440-1819.2001.00873.x>  
54  
55  
56  
57  
58  
59  
60

- 1  
2  
3 60. Wells TT, Clerkin EM, Ellis AJ, et al. Effect of antidepressant medication use on emotional  
4 information processing in major depression. *Am J Psychiatry* 2014;171(2):195-200.  
5  
6 doi:10.1176/appi.ajp.2013.12091243  
7  
8  
9
- 10 61. Zhang L, Yu F, Hu Q, et al. Effects of SSRI antidepressants on attentional bias toward  
11 emotional scenes in first-episode depressive patients: evidence from an eye-tracking  
12 study. *Psychiatry Investig* 2020;17(9):871-79. doi:10.30773/pi.2019.0345 [published  
13 Online First: 2020/9/17].  
14  
15  
16  
17  
18
- 19 62. Rovner BW, Folstein MF. Mini-mental state exam in clinical practice. *Hosp Pract (Off Ed)*  
20 1987;22(1a):99, 103, 06, 10.  
21  
22  
23
- 24 63. Weathers F, Blake D, Schnurr P, et al. The Life Events Checklist for DSM-5 (LEC-5).  
25 National Center for PTSD. 2013. <http://www.ptsd.va.gov>.  
26  
27
- 28 64. Weathers F, Litz B, Keane T, et al. The PTSD Checklist for DSM-5 (PCL-5). National  
29 Center for PTSD. 2013. <http://www.ptsd.va.gov>.  
30  
31  
32
- 33 65. Ozer EJ, Best SR, Lipsey TL, Weiss DS. Predictors of posttraumatic stress disorder and  
34 symptoms in adults: a meta-analysis. *Psychol Bull* 2003;129(1):52-73. doi:10.1037/0033-  
35 2909.129.1.52  
36  
37  
38  
39
- 40 66. Weathers FW, Bovin MJ, Lee DJ, et al. The Clinician-Administered PTSD Scale for DSM-5  
41 (CAPS-5): development and initial psychometric evaluation in military veterans. *Psychol*  
42 *Assess* 2018;30(3):383-95. doi:10.1037/pas0000486 [published Online First:  
43 2017/05/12].  
44  
45  
46  
47  
48
- 49 67. First M, Williams J, Karg R, et al. Structured clinical interview for DSM-5—Research  
50 version (SCID-5 for DSM-5, research version; SCID-5-RV). Arlington, VA: American  
51 Psychiatric Association 2015.  
52  
53  
54  
55  
56  
57  
58  
59  
60

- 1  
2  
3 68. Bernstein DP, Fink L, Handelsman L, et al. Initial reliability and validity of a new  
4  
5 retrospective measure of child abuse and neglect. *Am J Psychiatry* 1994;151(8):1132-6.  
6  
7 doi:10.1176/ajp.151.8.1132  
8  
9
- 10 69. Bifulco A, Brown GW, Harris TO. Childhood Experience of Care and Abuse (CECA): a  
11  
12 retrospective interview measure. *J Child Psychol Psychiatry* 1994;35(8):1419-35.  
13  
14 doi:10.1111/j.1469-7610.1994.tb01284.x  
15  
16
- 17 70. Straus MA. Measuring intrafamily conflict and violence: The Conflict Tactics (CT) Scales. *J*  
18  
19 *Marriage Fam* 1979;41(1):75-88. doi:10.2307/351733  
20  
21
- 22 71. Blumberg SJ, Bialostosky K, Hamilton WL, et al. The effectiveness of a short form of the  
23  
24 Household Food Security Scale. *Am J Public Health* 1999;89(8):1231-4.  
25  
26 doi:10.2105/ajph.89.8.1231  
27
- 28 72. Bovin MJ, Marx BP, Weathers FW, et al. Psychometric properties of the PTSD Checklist for  
29  
30 Diagnostic and Statistical Manual of Mental Disorders-Fifth Edition (PCL-5) in veterans.  
31  
32 *Psychol Assess* 2016;28(11):1379-91. doi:10.1037/pas0000254 [published Online First:  
33  
34 2015/12/14].  
35  
36
- 37 73. Kroenke K, Strine TW, Spitzer RL, et al. The PHQ-8 as a measure of current depression in  
38  
39 the general population. *J Affect Disord* 2009;114(1-3):163-73.  
40  
41 doi:10.1016/j.jad.2008.06.026 [published Online First: 2008/08/27].  
42  
43
- 44 74. Buysse DJ, Reynolds CF, 3rd, Monk TH, et al. The Pittsburgh Sleep Quality Index: a new  
45  
46 instrument for psychiatric practice and research. *Psychiatry Res* 1989;28(2):193-213.  
47  
48 doi:10.1016/0165-1781(89)90047-4  
49  
50  
51  
52  
53  
54  
55  
56  
57  
58  
59  
60

- 1  
2  
3 75. Germain A, Hall M, Krakow B, et al. A brief sleep scale for Posttraumatic Stress Disorder:  
4 Pittsburgh Sleep Quality Index Addendum for PTSD. *J Anxiety Disord* 2005;19(2):233-  
5  
6 44. doi:10.1016/j.janxdis.2004.02.001 [published Online First: 2004/11/10].  
7  
8  
9  
10 76. Bastien CH, Vallieres A, Morin CM. Validation of the Insomnia Severity Index as an  
11  
12 outcome measure for insomnia research. *Sleep Med* 2001;2(4):297-307.  
13  
14 doi:10.1016/s1389-9457(00)00065-4  
15  
16  
17 77. Buysse DJ. Sleep health: can we define it? Does it matter? *Sleep* 2014;37(1):9-17.  
18  
19 doi:10.5665/sleep.3298  
20  
21  
22 78. Johnson ES, Dickerson JF, Vollmer WM, et al. The feasibility of matching on a propensity  
23  
24 score for acupuncture in a prospective cohort study of patients with chronic pain. *BMC*  
25  
26 *Med Res Methodol* 2017;17(1):42. doi:10.1186/s12874-017-0318-4  
27  
28  
29 79. Takase B, Hattori H, Tanaka Y, et al. Acute effect of whole-body periodic acceleration on  
30  
31 brachial flow-mediated vasodilatation assessed by a novel semi-automatic vessel chasing  
32  
33 UNEXEF18G system. *J Cardiovasc Ultrasound* 2013;21(3):130-6.  
34  
35 doi:10.4250/jcu.2013.21.3.130 [published Online First: 2013/09/30].  
36  
37  
38 80. Tomiyama H, Kohro T, Higashi Y, et al. A multicenter study design to assess the clinical  
39  
40 usefulness of semi-automatic measurement of flow-mediated vasodilatation of the  
41  
42 brachial artery. *Int Heart J* 2012;53(3):170-5. doi:10.1536/ihj.53.170  
43  
44  
45 81. Tomiyama H, Kohro T, Higashi Y, et al. Reliability of measurement of endothelial function  
46  
47 across multiple institutions and establishment of reference values in Japanese.  
48  
49 *Atherosclerosis* 2015;242(2):433-42. doi:10.1016/j.atherosclerosis.2015.08.001  
50  
51 [published Online First: 2015/08/05].  
52  
53  
54  
55  
56  
57  
58  
59  
60

- 1  
2  
3 82. Thijssen DH, Black MA, Pyke KE, et al. Assessment of flow-mediated dilation in humans: a  
4 methodological and physiological guideline. *Am J Physiol Heart Circ Physiol*  
5  
6 2011;300(1):H2-12. doi:10.1152/ajpheart.00471.2010 [published Online First:  
7  
8 2010/10/15].  
9  
10  
11  
12 83. Corretti MC, Anderson TJ, Benjamin EJ, et al. Guidelines for the ultrasound assessment of  
13 endothelial-dependent flow-mediated vasodilation of the brachial artery: a report of the  
14 International Brachial Artery Reactivity Task Force. *J Am Coll Cardiol* 2002;39(2):257-  
15  
16 65. doi:10.1016/s0735-1097(01)01746-6  
17  
18  
19  
20  
21 84. Novak P. Quantitative autonomic testing. *J Vis Exp* 2011(53):e2502. doi:10.3791/2502  
22  
23  
24 85. Norrholm SD, Glover EM, Stevens JS, et al. Fear load: the psychophysiological over-  
25 expression of fear as an intermediate phenotype associated with trauma reactions. *Int J*  
26  
27 *Psychophysiol* 2015;98(2 Pt 2):270-75. doi:10.1016/j.ijpsycho.2014.11.005 [published  
28  
29 Online First: 2014/11/18].  
30  
31  
32  
33 86. Jovanovic T, Ely T, Fani N, et al. Reduced neural activation during an inhibition task is  
34 associated with impaired fear inhibition in a traumatized civilian sample. *Cortex*  
35  
36 2013;49(7):1884-91. doi:10.1016/j.cortex.2012.08.011 [published Online First:  
37  
38 2012/09/05].  
39  
40  
41  
42 87. Glover EM, Phifer JE, Crain DF, et al. Tools for translational neuroscience: PTSD is  
43 associated with heightened fear responses using acoustic startle but not skin conductance  
44  
45 measures. *Depress Anxiety* 2011;28(12):1058-66. doi:10.1002/da.20880 [published  
46  
47 Online First: 2011/09/02].  
48  
49  
50  
51 88. Davis M. The role of the amygdala in fear-potentiated startle: implications for animal models  
52 of anxiety. *Trends Pharmacol Sci* 1992;13(1):35-41. doi:10.1016/0165-6147(92)90014-w  
53  
54  
55  
56  
57  
58  
59  
60

- 1  
2  
3 89. Lonsdorf TB, Golkar A, Lindström KM, et al. BDNFval66met affects neural activation  
4 pattern during fear conditioning and 24 h delayed fear recall. *Soc Cogn Affect Neurosci*  
5 2015;10(5):664-71. doi:10.1093/scan/nsu102 [published Online First: 2014/08/07].  
6  
7  
8  
9  
10 90. Lazarov A, Ben-Zion Z, Shamai D, et al. Free viewing of sad and happy faces in depression:  
11 a potential target for attention bias modification. *J Affect Disord* 2018;238:94-100.  
12 doi:10.1016/j.jad.2018.05.047 [published Online First: 2018/05/29].  
13  
14  
15  
16  
17 91. Tottenham N, Tanaka JW, Leon AC, et al. The NimStim set of facial expressions: judgments  
18 from untrained research participants. *Psychiatry Res* 2009;168(3):242-9.  
19 doi:10.1016/j.psychres.2008.05.006 [published Online First: 2009/06/28].  
20  
21  
22  
23  
24 92. Jy W, Horstman LL, Jimenez JJ, et al. Measuring circulating cell-derived microparticles. *J*  
25 *Thromb Haemost* 2004;2(10):1842-51. doi:10.1111/j.1538-7836.2004.00936.x  
26  
27  
28  
29 93. Bernal-Mizrachi L, Jy W, Jimenez JJ, et al. High levels of circulating endothelial  
30 microparticles in patients with acute coronary syndromes. *Am Heart J* 2003;145(6):962-  
31 70. doi:10.1016/s0002-8703(03)00103-0  
32  
33  
34  
35 94. Garcia S, Chirinos J, Jimenez J, et al. Phenotypic assessment of endothelial microparticles in  
36 patients with heart failure and after heart transplantation: switch from cell activation to  
37 apoptosis. *J Heart Lung Transplant* 2005;24(12):2184-9.  
38 doi:10.1016/j.healun.2005.07.006 [published Online First: 2005/11/02].  
39  
40  
41  
42  
43  
44 95. Jimenez JJ, Jy W, Mauro LM, et al. Endothelial microparticles released in thrombotic  
45 thrombocytopenic purpura express von Willebrand factor and markers of endothelial  
46 activation. *Br J Haematol* 2003;123(5):896-902. doi:10.1046/j.1365-2141.2003.04716.x  
47  
48  
49  
50  
51  
52  
53  
54  
55  
56  
57  
58  
59  
60



- 1  
2  
3 96. Porges SW. Orienting in a defensive world: mammalian modifications of our evolutionary  
4 heritage. A polyvagal theory. *Psychophysiology* 1995;32(4):301-18. doi:10.1111/j.1469-  
5 8986.1995.tb01213.x  
6  
7  
8  
9  
10 97. Preacher KJ, Hayes AF. SPSS and SAS procedures for estimating indirect effects in simple  
11 mediation models. *Behav Res Methods Instrum Comput* 2004;36(4):717-31.  
12 doi:10.3758/BF03206553  
13  
14  
15  
16 98. Jovanovic T, Norrholm SD, Blanding NQ, et al. Impaired fear inhibition is a biomarker of  
17 PTSD but not depression. *Depress Anxiety* 2010;27(3):244-51. doi:10.1002/da.20663  
18 [published Online First: 2010/02/10].  
19  
20  
21  
22  
23 99. Baker DG, Nievergelt CM, O'Connor DT. Biomarkers of PTSD: neuropeptides and immune  
24 signaling. *Neuropharmacology* 2012;62(2):663-73.  
25 doi:10.1016/j.neuropharm.2011.02.027 [published Online First: 2011/03/12].  
26  
27  
28  
29  
30 100. Tibshirani R. Regression shrinkage and selection via the lasso. *J R Statist Soc B*  
31 1996;58(1):267-88. doi:10.1111/j.2517-6161.1996.tb02080.x  
32  
33  
34  
35 101. Neter J, Wasserman W, Kutner M. Applied Linear Regression Models. Chicago, IL:  
36 Richard D. Irwin, Inc 1983.  
37  
38  
39  
40  
41  
42  
43  
44  
45  
46  
47  
48  
49  
50  
51  
52  
53  
54  
55  
56  
57  
58  
59  
60

## FIGURE LEGENDS

Figure 1. Conceptual model for the study. The aim examining whether PTSD diagnosis is related to endothelial dysfunction is indicated by the dashed arrows. The aim examining associations of posttraumatic fear and dysphoria with endothelial dysfunction is indicated by the solid arrow. Mechanisms examined in exploratory analyses are printed above and below the solid arrow.

Figure 2. Study timeline. CAPS-5=Clinician-Administered PTSD Scale for *DSM-5*. CVD=cardiovascular disease. FMD=flow-mediated dilation. LEC-5=Life Events Checklist for *DSM-5*. PCL-5=PTSD Checklist for *DSM-5*. SCID-5=Structured Clinical Interview for *DSM-5*.

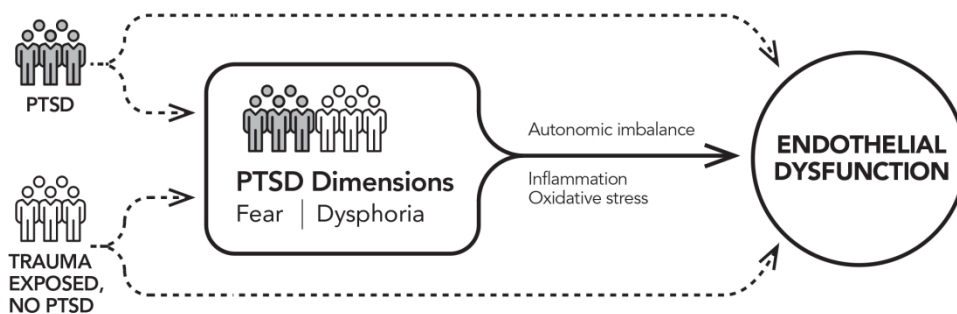

Figure 1. Conceptual model for the study. The aim examining whether PTSD diagnosis is related to endothelial dysfunction is indicated by the dashed arrows. The aim examining associations of posttraumatic fear and dysphoria with endothelial dysfunction is indicated by the solid arrow. Mechanisms examined in exploratory analyses are printed above and below the solid arrow.

176x61mm (300 x 300 DPI)

1  
2  
3  
4  
5  
6  
7  
8  
9  
10  
11  
12  
13  
14  
15  
16  
17  
18  
19  
20  
21  
22  
23  
24  
25  
26  
27  
28  
29  
30  
31  
32  
33  
34  
35  
36  
37  
38  
39  
40  
41  
42  
43  
44  
45  
46  
47  
48  
49  
50  
51  
52  
53  
54  
55  
56  
57  
58  
59  
60

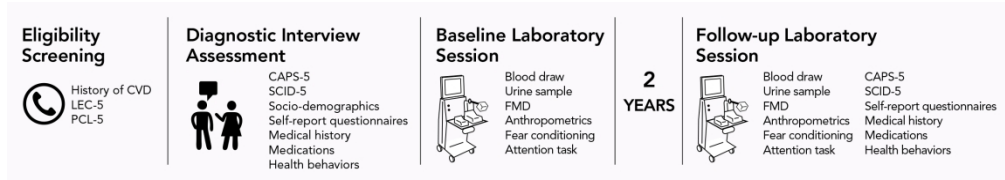

Figure 2. Study timeline. CAPS-5=Clinician-Administered PTSD Scale for DSM-5. CVD=cardiovascular disease. FMD=flow-mediated dilation. LEC-5=Life Events Checklist for DSM-5. PCL-5=PTSD Checklist for DSM-5. SCID-5=Structured Clinical Interview for DSM-5.
